## **SUPPLEMENTARY MATERIAL**

- 1. Expanded Methods and Results**
- 2. Figures S1-S7**
- 3. Tables S1-S8**
- 4. References**

## Expanded Methods and Results

### 1. Patients, study cohorts, and curation strategies for genetic variations

#### 1) BrS cohort-I

BrS cohort-I consisted of 415 Japanese probands with BrS who underwent genetic testing for *SCN5A* mutations and followed up between 1988 and 2013.<sup>1</sup> Genomic PCR followed by Sanger sequencing identified 55 rare *SCN5A* variants in 60 probands (*SCN5A*(+)), which were categorized as missense (n=39), in-frame deletion (n=1), nonsense (n=6), frame-shift truncation (n=6), and canonical splice site variations (n=3) (Table S1). Their pathogenesis was curated based on several human variation databases and seven *in silico* phenotype prediction algorithms (SIFT, PolyPhen-2, Species, Paralogue, Grantham, Condel, MutationAssesor) as originally described by Kapplinger et al.<sup>2</sup> The scores of seven algorithms for each mutation are listed in Table S4.

In our study, we first re-evaluated the frequency of all 55 variations using two global human variation databases (gnomAD,<sup>3</sup> 1000 Genomes Project<sup>4</sup>) and the Japanese whole-genome sequencing database (4.7KJPN).<sup>5</sup> Nonsense, frame-shift truncation, and canonical splice site variations (n=15) were classified as null variants of pathogenicity with very strong evidence (PVS1) according to the ACMG-AMP guidelines.<sup>6</sup> We then performed a PubMed search for previous literature describing functional characterizations of the 55 variations and found 21 publications (including five of our own) describing the loss-of-function (LOF) properties of 17 missense, one in-frame deletion, and four nonsense variations. Based on these database searches, 22 missense variations were assigned as variants of unknown significance (VUSs) (Figure 1, Table S1), and they were subjected to functional analyses using patch clamp (Figure S1).

In order to identify mutations in genes other than *SCN5A*, whole-exome sequence was required. However, the cohort-I patients only agreed to the genetic testing for *SCN5A* mutations at the time of enrollment, and some of them have already passed away; therefore, we freshly recruited independent Japanese BrS probands to perform whole-exome sequencing.

#### 2) BrS cohort-II

In order to identify non-*SCN5A* genes associated with lethal arrhythmic events in BrS, we enrolled new unrelated BrS patients (originally n=297) who had been diagnosed as “*SCN5A* mutation-negative” in advance by genetic testing in clinical institutions all over Japan. After performing whole-exome sequencing in BrS-probands and control Japanese (n=372) in our study and found 9 *SCN5A* mutation carriers whose mutations were overlooked during the initial Sanger sequencings in each institution. Accordingly, we excluded 9 patients from the new BrS cohort leaving 288 probands in the Japanese *SCN5A* mutation-negative BrS (BrS cohort-II).

Genetic testing of BrS in Japan is performed preferentially for patients with symptoms or lethal arrhythmic events, therefore, symptoms and the history of lethal arrhythmic events of cohort-II were more prevalent than in cohort-I (Table 1).

## 2. Electrophysiological analysis of 22 *SCN5A*-VUSs

Functionally undetermined 22 VUSs listed in table S1 were subjects for the electrophysiological analysis by patch-clamping in this study. Plasmids with these 22 VUSs were created by site-directed mutagenesis using the QuikChange site-directed mutagenesis kit (Agilent Technologies, Santa Clara, CA) and specific primers on wild-type (WT) *SCN5A* plasmid encoding human Nav1.5 (NM\_000335.5). Absence of unwanted sequence errors was confirmed by Sanger sequencing.

Patch-clamp analysis for *SCN5A* mutations were performed as previously described.<sup>7</sup> Briefly, mammalian cell line HEK293T (i.e. tsA-201) ( $4 \times 10^5$ ) was passaged on 6 cm dishes, and 24 hrs later, transiently transfected with pEGFP plasmids (0.8  $\mu$ g) and WT or mutant *SCN5A* plasmids Nav1.5 (1.6  $\mu$ g) using Lipofectamine LTX (Thermo Fisher Scientific, Waltham, MA). Another 24 hrs later, cells were subjected to the patch-clamp analysis. Whole-cell  $I_{Na}$  currents and capacitances were recorded from the cells labelled with EGFP fluorescence using Axopatch 200B amplifier (Molecular devices, Sunnyvale, CA). Series resistance errors were reduced by 60~70% using electronic compensation. Holding potentials were set at -120 mV, and pipette resistance was 2-3 M $\Omega$ . Bath solutions for  $I_{Na}$  recordings contained (in mmol/L): 36 NaCl, 109 N-methylglucamine, 4 KCl, 1.8 CaCl<sub>2</sub>, 1 MgCl<sub>2</sub>, 10 HEPES and 10 glucose, with a pH of 7.35 adjusted with NaOH. Pipette solution for  $I_{Na}$  recordings contained (in mmol/L): 10 NaF, 110 CsF, 20 CsCl, 10 EGTA, and 10 HEPES with a pH of 7.35 adjusted with CsOH. All signals were acquired at 20-50 kHz (Digidata 1332, Molecular devices) with Clampex 10 software (Molecular devices) and filtered at 5 kHz with a 4-pole Bessel low pass filter. Membrane currents were analyzed with Clampfit 10 software (Molecular devices) and SigmaPlot (Systat Software Inc, CA).

Current-voltage relationship and voltage-dependent activation were determined by the test pulse stepped to a voltage between -90 mV to +70 mV for 20 ms. Peak Na current density (peak current amplitude/cell capacitance; pA/pF) of each mutation was calculated, and the % peak current density is a fraction of peak current density of mutant Nav1.5 against WT-Nav1.5. For assessment of steady-state inactivation, the membrane potential was stepped to a voltage between -140 and -30 mV for 100 ms, and then peak Na current was measured during a -20 mV test potential. Recovery from inactivation was assessed by a double-pulse protocol consisting of a 500 ms prepulse to -20 mV, which was designed to fully inactivate all channels, followed by a variable-duration interpulse interval ( $\Delta t$ ) at -120 mV and a test pulse to -20 mV. The time from establishing the whole-cell configuration to the onset of recording was consistent cell-to-cell to exclude the possible time-dependent shift of steady-state inactivation. To determine activation parameters, the current-voltage relationship was fitted to the Boltzmann equation:  $I = (V - V_{rev}) \times G_{max} \times [1 + \exp((V - V_{1/2})/k)]^{-1}$ , where  $I$  is the peak Na current during the test pulse potential  $V$ . The parameters estimated by the fitting are  $V_{rev}$  (reversal potential),  $G_{max}$  (maximum conductance),  $V_{1/2}$  (voltage for half-activation), and  $k$  (slope factor). Steady-state inactivation was fitted with the Boltzmann equation:  $I/I_{max} = [1 + \exp((V - V_{1/2})/k)]^{-1}$  to determine the membrane potential for half maximal inactivation ( $V_{1/2}$ ) and the slope factor  $k$ . Recovery from inactivation was analyzed by fitting data with a double exponential equation:  $I/I_{max} = A_0 + A_{fast} \times \exp(-t/\tau_{fast}) + A_{slow} \times \exp(-t/\tau_{slow})$ , where  $I_{max}$  is the maximum peak Na current,  $A_0$  is a constant value,  $A_{fast}$  and  $A_{slow}$  are fractions of fast and slow recovering components, respectively,

and  $\tau_{\text{fast}}$  and  $\tau_{\text{slow}}$  are the time constants of fast and slow recovering components, respectively. One-way ANOVA followed by post hoc Bonferroni correction was used to statistically analyze the channel properties among multiple groups.

The original patch clamp data of the p.N406S were provided by Itoh et al.<sup>8</sup> and re-analyzed. The %peak current density of p.N406S was  $81.6 \pm 51.2$  (n=20, p=0.153 vs WT), and it was assigned to non-LOF.

### 3. Evaluation of channel properties for predicting the lethal arrhythmic events

Three major Na channel properties of the patch clamp data; activation (shift of  $V_{1/2}$ ), inactivation (shift of  $V_{1/2}$ ), and %peak current density, were used for univariate analysis using a Cox proportional hazards model in 28 functional *SCN5A* variants (L136P, R282H, R376H, N406S, Y416C, E428K, R689H, R693C, A735V, Q779K, R814Q, R988Q, R1195H, H1200Y, E1225K, T1247I, V1328M, V1405M, A1428S, R1432S, K1527R, R1644C, R1644H, T1709M, E1784K, R1913C, R1919H, H1923D; Tables S2, S4). Receiver operating characteristic analysis showed significant association (p=0.01) between %peak current density and lethal arrhythmic events [area under the curve (AUC)=0.73 (95% CI: 0.56-0.91), cut-off values 66.0%]. The optimal cut-off value 66.0% was very close to the %peak current density border zone between LOF variants group and non-LOF group (62.0%-65.6%, between A1428S and R988Q of the Figure 2). No significant relationships were seen with activation [AUC=0.54 (95%CI: 0.20-0.72), p=0.77, cut-off value=-2.5 mV] or inactivation parameters [AUC=0.60 (95%CI: 0.35-0.84), p=0.44, cut-off value=3.3 mV]. These data indicate that the %peak current density is the most accurate channel property to predict the lethal events in BrS. The border zone %peak current density of LOF variants and Non-LOF variants was 53.2% (R693C)-65.6% (R988Q) (Table S2).

### 4. Sensitivity analyses using bootstrap method

We performed bootstrap methods to obtain 95% confidence intervals (CIs) for the annual event rates (Table 2) and the hazard ratios (HRs) (Table 3). We performed the analysis using 500 bootstrap resamples and obtained 500 HRs using Cox proportional hazard models, of which the mean values were point-estimates, and the 2.5<sup>th</sup> and 97.5<sup>th</sup> percentiles were 95% CIs. R statistical software (version 4.0.2),<sup>9</sup> R package “boot”,<sup>10,11</sup> and R package “survival” were used.<sup>12</sup> Note that we used seed number “123”. As shown in the Table S6A, bootstrapped annual event rates of all BrS patients, *in silico*-predicted pathogenic rare *SCN5A* variant carriers, and *in vitro*-validated LOF *SCN5A* mutation carriers were 2.5%/year (95%CI: 1.85–3.12), 5.1%/year (95%CI: 2.37–8.49), and 7.9%/year (95%CI: 3.99–14.60), respectively; compatible with the observation presented in Table 2. Bootstrapped HRs (95%CI) of the variables evaluated by univariate analysis (Table S6B) were comparable to those in Table 3A, except that the bootstrap method was not effective in calculating the HR of LAE by gender due to the small sample size of female patients (Male=403, Female=12). Multivariate analysis showed that the HR of LOF-*SCN5A* mutations (HR=2.98, 95%CI: 1.31–6.08) was higher than that of *in silico*-predicted rare *SCN5A* variations (HR=2.06, 95%CI: 1.004–4.16) (Table S6C), consistent with the data in Table 3B.

## 5. Whole-exome sequencing

Genomic DNA was extracted from peripheral blood lymphocytes of the Japanese probands of BrS cohort-II (n=288) and controls (n=372) by standard protocols. All the procedures of sequencings and data processing were performed as previously described.<sup>13</sup> The DNA yields were assessed by measurements using Qubit fluorometer (Thermo Fisher Scientific) and Quant-IT dsDNA Assay Kit, Broad Range (Thermo Fisher Scientific). The purity of the DNA was assessed by spectrophotometry (OD 260:280 and 260:230 ratios) using a Nanodrop instrument (Thermo Fisher Scientific). After obtaining sheared genomic DNA of the target base pair size by Covaris E220 (Covaris, Woburn, MA), individual sample libraries were prepared by using Agilent SureSelect Exome Target Enrichment System (V4: case=12; V5: control=127; V5+UTRs: control=208; V6: case=276, control=37) (Agilent Technologies, Santa Clara, CA), and sequenced on the HiSeq2500 platform (Illumina, San Diego, CA) with paired-end reads of 101 bp for insert libraries consisting of 150 to 200 bp fragments. Acquired sequence data were converted into Fastq format by bcl2fastq software, and aligned and mapped to the human reference genome sequence hg19/GRCh37 by Novoalign software. (Novocraft Technologies, Kuala Lumpur, Malaysia) Aligned reads were sorted by Novosort software (Novocraft) and subjected to the marking of PCR and optical duplication by MarkDuplicates in the Picard tools package. Whole-exome data resulted in an average depth of 71 and a mean coverage of 95.4% at 10-fold. The Genome Analysis Toolkit (GATK) v3.3-0 was used to perform local realignment (GATK IndelRealigner) and variant call (GATK HaplotypeCaller) was implemented in an in-house workflow management tool. The candidate variations causing nonsynonymous, stop-gain, stop-loss or splice site substitutions and insertions/deletions (indels) occurring frameshift, in-frame or splice sites substitution were determined by using GATK. Single nucleotide variations (SNVs) and indels were annotated using ANNOVAR software. Substitutions that met the following criteria were selected as “deleterious”: (1) stop gain, stop loss, nonsynonymous, or splice site mutations according to GENCODE basic version 19 downloaded from the UCSC genome browser; (2) alternative allele frequencies at mutation loci  $\leq 0.5\%$  in the following databases: 1000 Genomes Project data on all populations<sup>4</sup>; the Genome Aggregation Database as ethnic matched databases (gnomAD)<sup>3</sup>; and SNV allele frequency collected from whole-genome sequencing data of 4,773 healthy Japanese individuals (4.7KJPN)<sup>5</sup>; and (3) mutations not included in the UCSC segmental duplication region. Variations with minor allele frequencies (MAF)  $>1\%$  in any of the public databases (gnomAD, 1000 Genomes and 4.7KJPN) were filtered out.

## 6. Gene-wise association test

To identify novel genes predisposing to BrS, gene-wise association tests were carried out to compare the proportion of rare variations with MAF of less than 1.0%. After the collection of rare variations by whole-exome sequencings, we removed common variants using the following criteria: alternative allele frequency of more than 1.0% in any public databases (ExAC,<sup>14</sup> ESP6500,<sup>15</sup> 1000 Genomes,<sup>4</sup> HGVD,<sup>16</sup> and ToMMo 2KJPN<sup>17</sup>) or more than 1.0% in control samples in this study; call rate of less than 95% in the study samples;

and genotyping quality score of less than 99. We also removed variants not being any of nonsynonymous, stop-gain, stop-loss, frameshift, nor splicing-affected based on the GENCODE basic v19 gene prediction.<sup>18</sup> For a single-gene wise association test, three different statistical tests: Combined Multivariate and Collapsing (CMC),<sup>19</sup> Madsen-Browning method,<sup>20</sup> and SNP-set Kernel Association Test (SKAT-O),<sup>21</sup> which are implemented in Efficient and Parallelizable Association Container Toolbox (EPACTS version 3.3.0) (Figure S6).<sup>22</sup> CMC method was used to filter the genes as the burden test, while SKAT-O as the combined test of burden and variance component. For weighing variants, MAF of control subjects were used for the CMC and Madsen-Browning methods. Bonferroni adjustment was used for multiple testing resulting in a cutoff of  $P < 2.94 \times 10^{-6}$  ( $= 0.05/16,985$ ) as a gene-wise significant level.

### 7. Rare variants of *SCN5A*-modulating BrS-associated genes

Among previously recognised 22 non-*SCN5A* BrS-associated genes, rare variations (MAF < 1% or 0.3%) were found in only 17 genes except 5 genes (*ABCC9*, *ANK2*, *CACNB2*, *KCNE5*, *FGF12*), but they were not enriched in BrS cohort-II (Table S7). Among the 17 non-*SCN5A* BrS-associated genes, we defined eight genes (*GPDIL*, *PKP2*, *MOG1*, *SCN10A*, *SCN1B*, *SCN2B*, *SCN3B*, and *SLMAP*) as *SCN5A*-modulating BrS-associated genes that are known to modulate cardiac Na channel function. We performed gene-wise rare variation association test, but rare variants of neither 17 BrS-associated genes nor 8 *SCN5A*-modifying BrS-associated genes were enriched in BrS cohort-II (Table S8). Kaplan-Meier analysis demonstrated that the rare variations of neither 17 BrS-associated genes nor 8 *SCN5A*-modifying BrS-associated genes affected the event-free survival (Figure 5, and Figure S7).

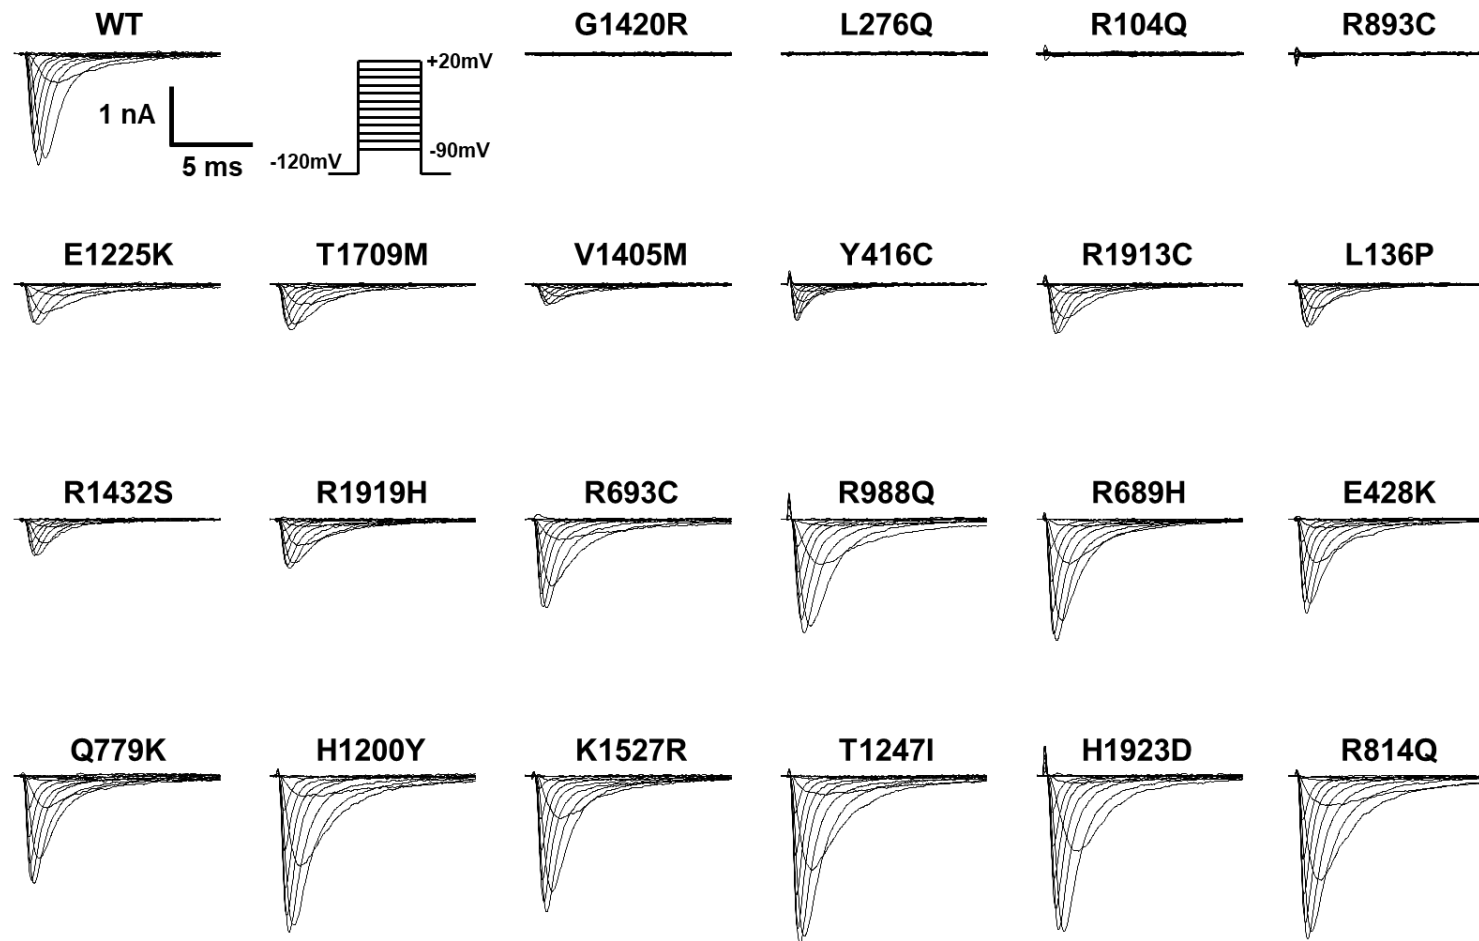

**Figure S1. Representative current traces of WT and 22 missense VUS Nav1.5 channels heterologously expressed in HEK293T cells.**

Whole-cell Na currents were recorded by the test pulses (from -90 mV to +20 mV with 10 mV increment) from a holding potential of -120 mV, and the peak current density (=peak current amplitude/cell capacitance) of each variant was calculated. Percentage peak current density, as a fraction of peak current density versus wild type (WT)-Nav1.5, was plotted in the Figure 2. Statistical analysis revealed significant reduction of peak current density than WT, i.e. loss-of-function (LOF) properties, in 13 variations (G1420R–R693C), but not in the other 9 variations (Non-LOF; R988Q–R814Q). Further electrophysiological data are available in the Table 2. The border zone %peak current density of LOF and Non-LOF was 53.2% (R693C)- 65.6% (R988Q).

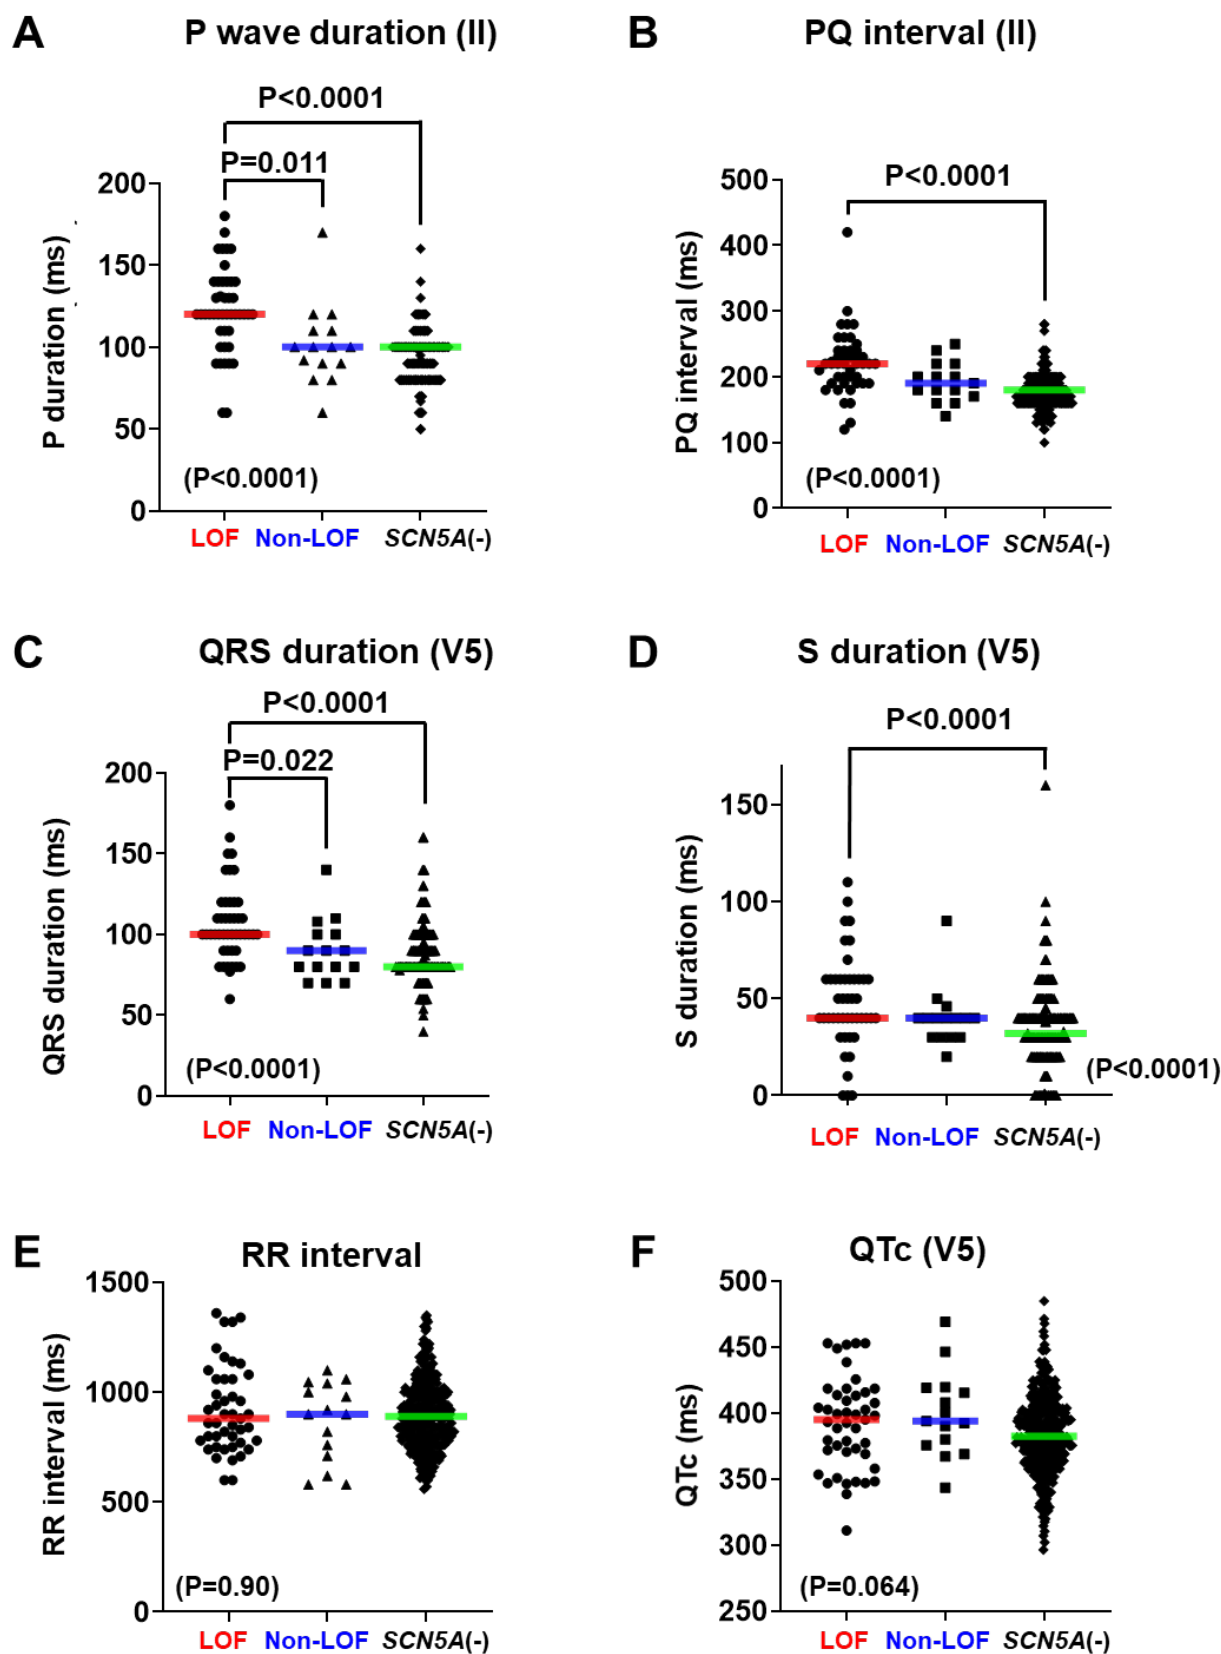

**Figure S2.** ECG parameters of patients with BrS of three subgroups classified by the Na channel function properties. **A.** P wave duration, **B.** PQ interval, **C.** QRS duration, **D.** S duration, **E.** RR-interval, and **F.** Corrected QT interval by Bazett's formula (QTc) of three groups are shown. Patients carrying the LOF-*SCN5A* mutations exhibited significantly impaired ECG conduction parameters compared with those with Non-LOF and/or *SCN5A* mutation non-carriers (*SCN5A*(-)). The horizontal bar represents the median. Statistical analysis was performed using Kruskal-Wallis test and post-hoc Dunn's test for multiple comparisons. P values with parentheses indicate statistical significance among three groups.



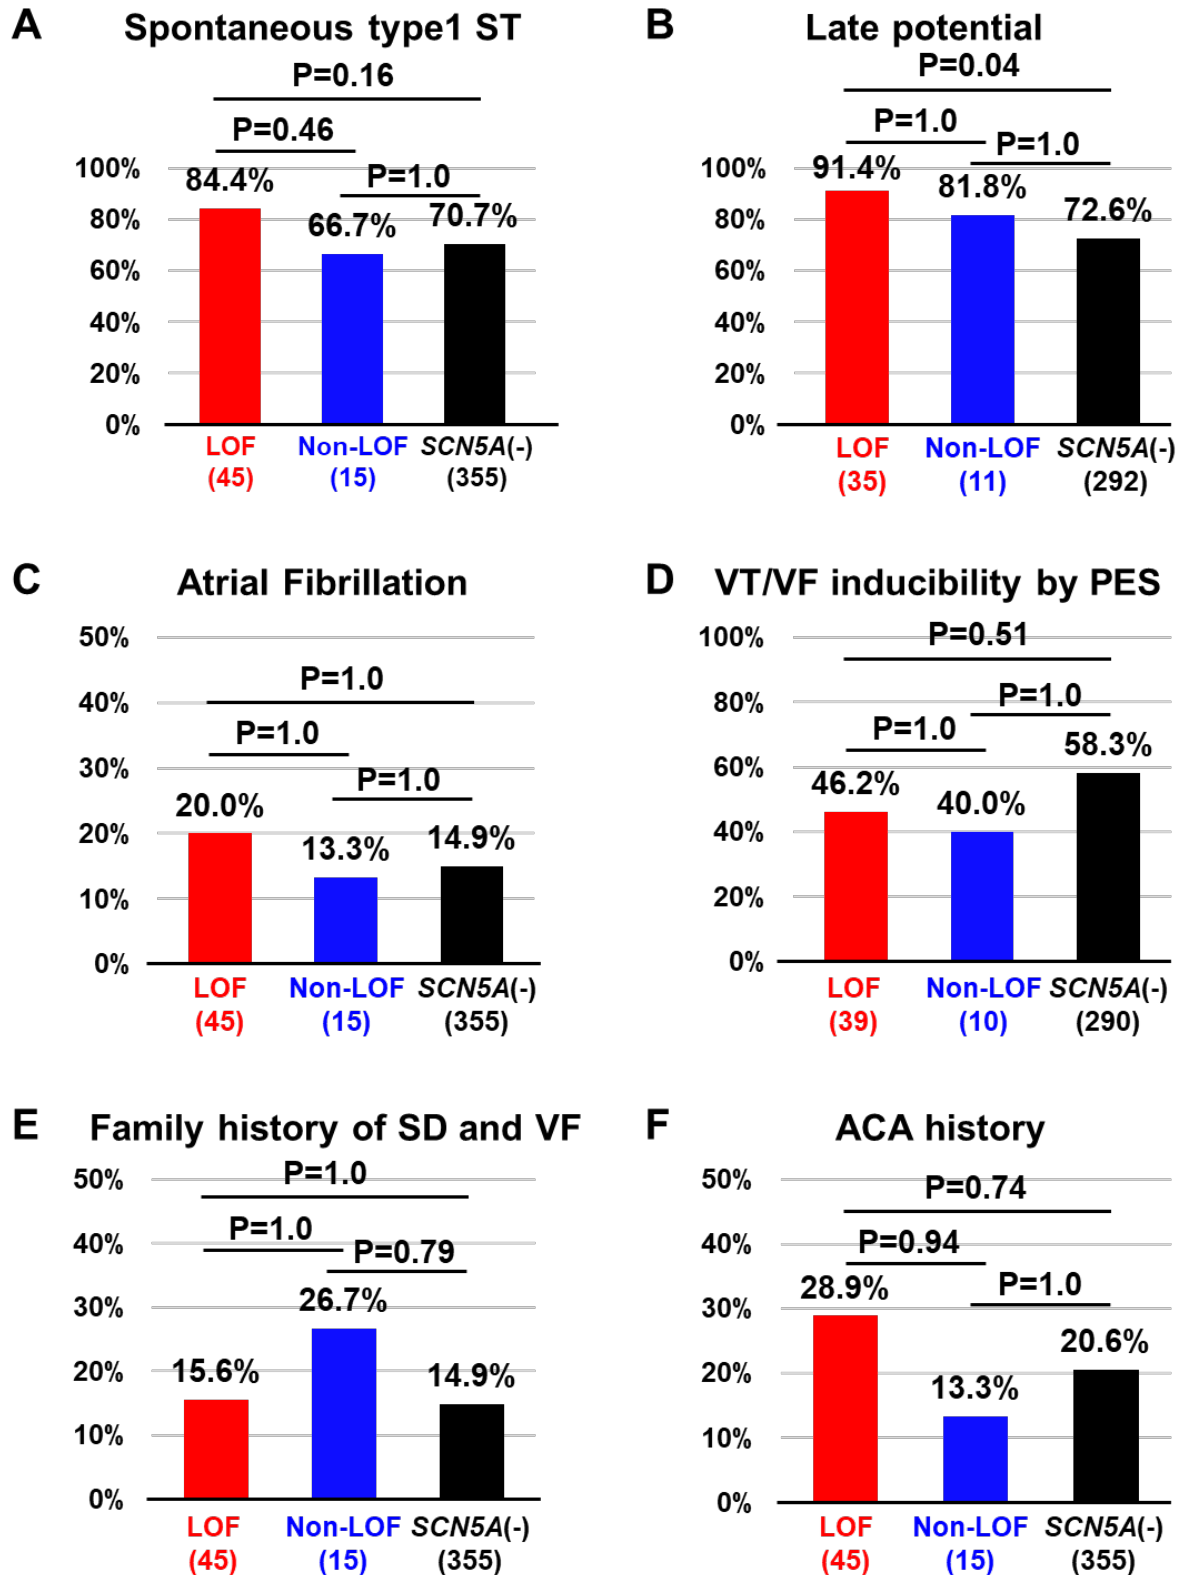

**Figure S3. Electrophysiological and clinical findings among three groups of BrS cohort-I.** There were no significant differences among three groups in terms of **A.** spontaneous type-1 ST elevation, **C.** atrial fibrillation, **D.** VT/VF inducibility by programmed electrical stimulation (PES), **E.** Family history of sudden death and VF, and **F.** Aborted cardiac arrest (ACA) history. **B.** Late potential was more prevalent in LOF than in *SCN5A(-)*. Statistical analysis was performed using Fisher's exact test with Bonferroni adjustment for multiple comparisons.

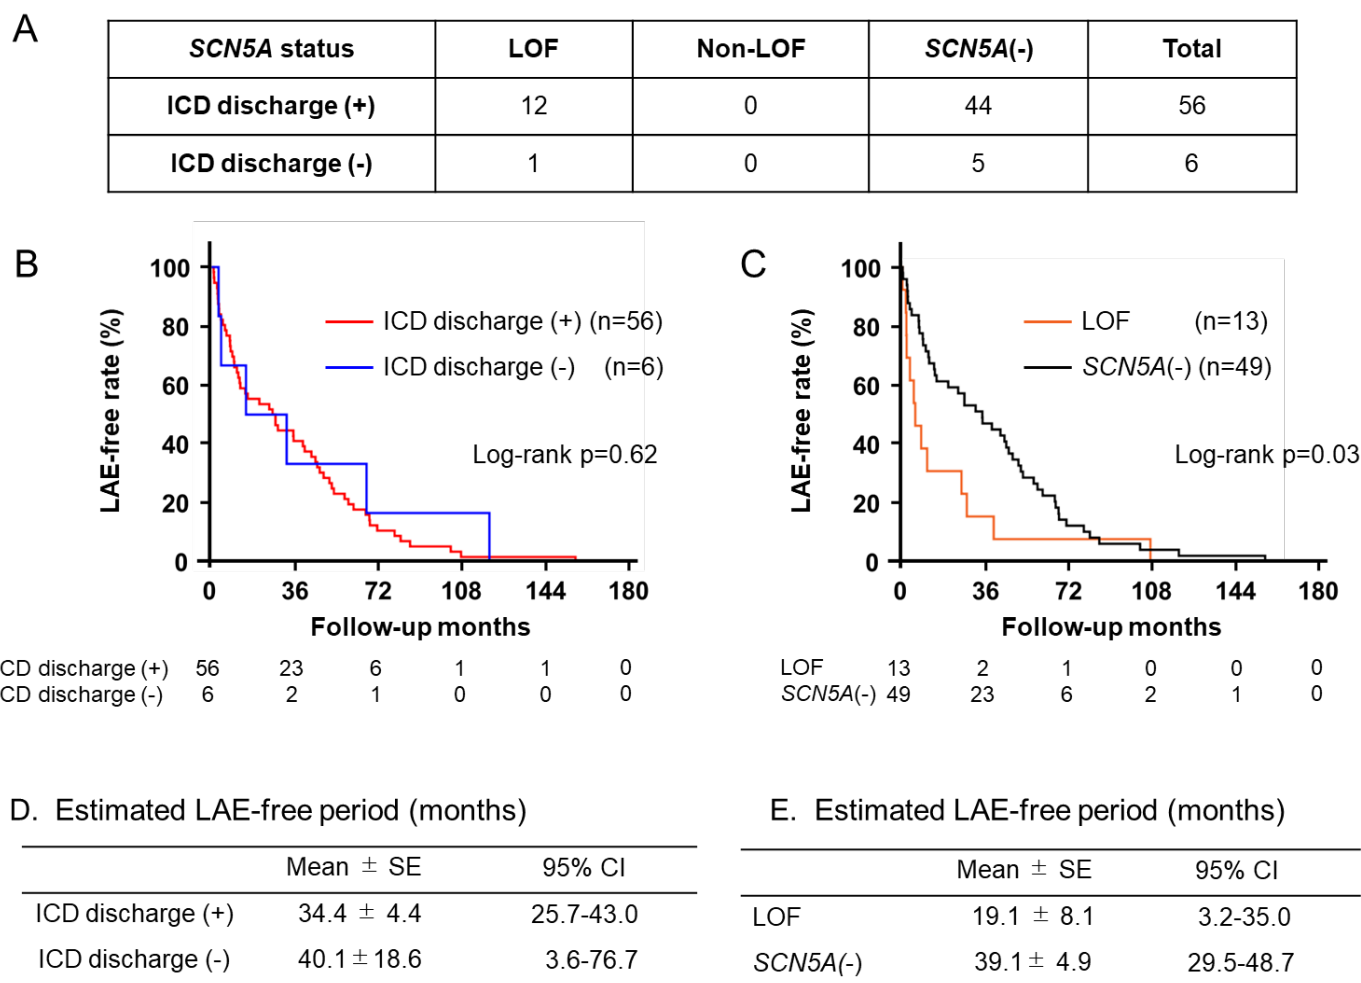

**Figure S4. *SCN5A* status and the Kaplan-Meier analysis of 62 probands experienced lethal arrhythmic events.**

**A.** *SCN5A* status and the ICD discharges during the follow-up period of 62 probands. **B.** Kaplan-Meier analyses of lethal arrhythmic event (LAE)-free survival rate of 62 probands with (n=56) or without (n=6) appropriated ICD discharges showed nearly superimposable curves during the follow-up period (log-rank  $P=0.62$ ). These data support the notion that an appropriate ICD discharge serves as a surrogate for sudden cardiac death in BrS. **C.** LOF-*SCN5A* carriers (n=13) experienced significantly earlier LAEs than *SCN5A*(-) (n=49), consistent with the findings in Fig 4C (log-rank  $P=0.03$ ). **D, E.** Estimated LAE-free period of each group. Note that no probands carrying Non-LOF *SCN5A* variations experienced LAEs during the follow up. These data suggest that the prognosis of BrS patients can be discriminated based on LOF properties of the *SCN5A* variants.

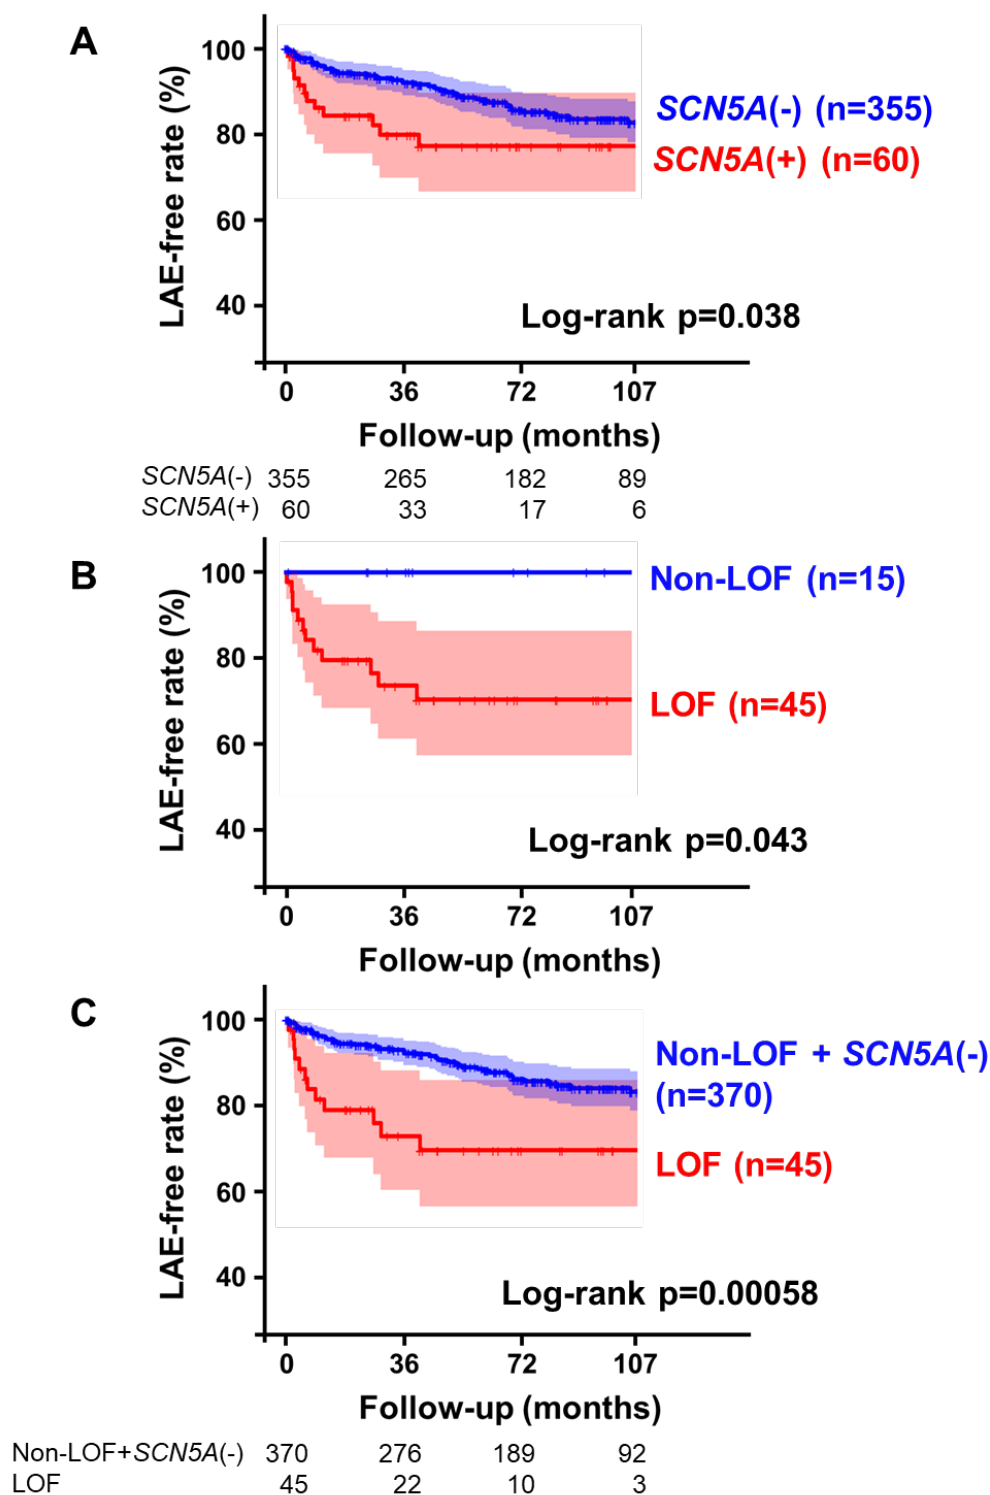

**Figure S5. Stratified Kaplan–Meier analysis of lethal arrhythmic event-free survival during 107 months of follow-up in BrS cohort-I**

To avoid the poor curve estimation in the Kaplan–Meier analysis due to small sample size and/or progressively enhanced susceptibility to lethal arrhythmic events (LAEs) in the loss-of-function (LOF)-*SCN5A* mutation carriers after 107 months (Figure 4), stratification analysis of LAE-survival during the first 107 months of follow-up was performed. **A.** LAE-free survival during the follow-up period in BrS probands carrying *SCN5A* rare variations (*SCN5A*(+);  $n=60$ ) and *SCN5A*(-) ( $n=355$ ). Confidence bands indicate 95% pointwise CI. **B.** Time course of BrS patients with LOF-*SCN5A* mutations (LOF,  $n=45$ ), and Non-LOF ( $n=15$ ). Non-LOF probands have no LAEs during the follow-up period. **C.** LAE-free survival of LOF ( $n=45$ ) vs Non-LOF plus *SCN5A*(-) ( $n=370$ ). These data are qualitatively similar to the Kaplan–Meier analysis of the entire mean follow-up period of 72 months (ranging from 1 to 249 months). (Figure 4)

## A. CMC

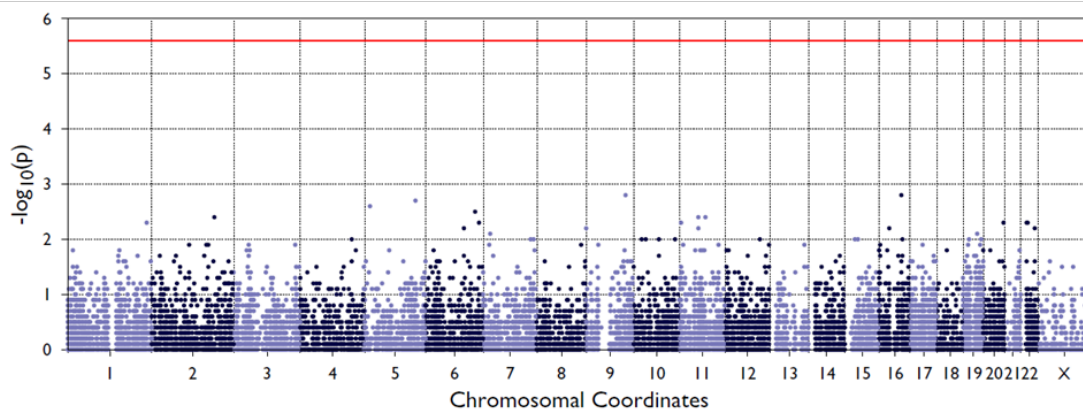

## B. Madsen-Browning

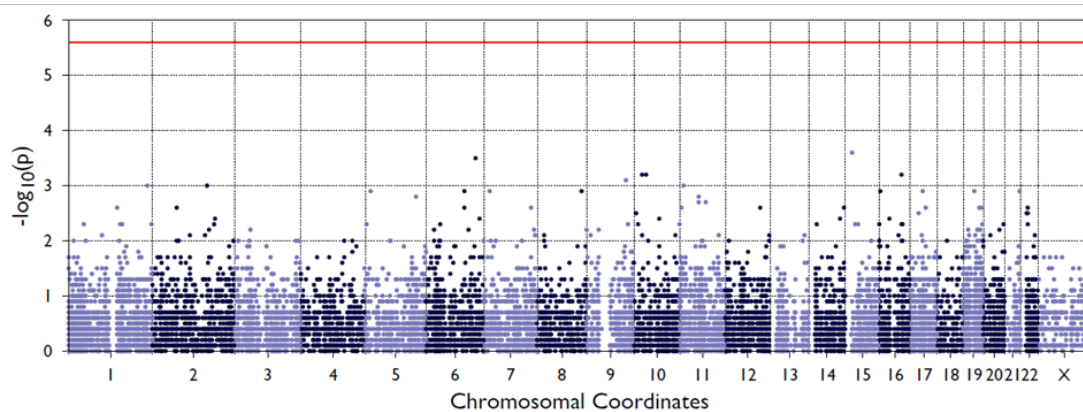

## C. SKAT-O

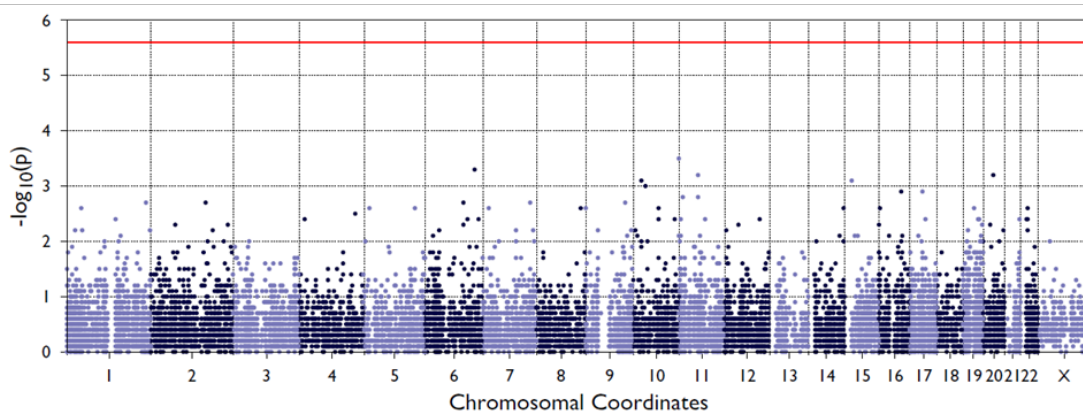

**Figure S6. Manhattan plots for the gene-wise association tests**

Results of gene-wise association of three different methods are shown; **A.** Burden test CMC, **B.** Madsen-Browning with adjusted weights of variants and **C.** a combined test of burden and variance-component, SKAT-O. No genes exceeded the Bonferroni-adjusted gene-wise significance threshold ( $p=2.94 \times 10^{-6}$ ; red lines) in three models.

**A. MAF < 1%**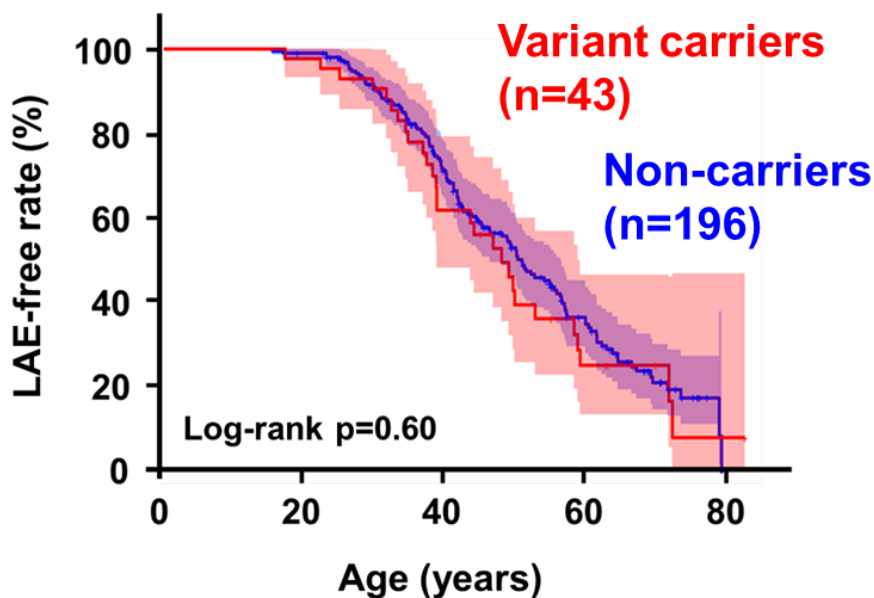**B. MAF < 0.3%**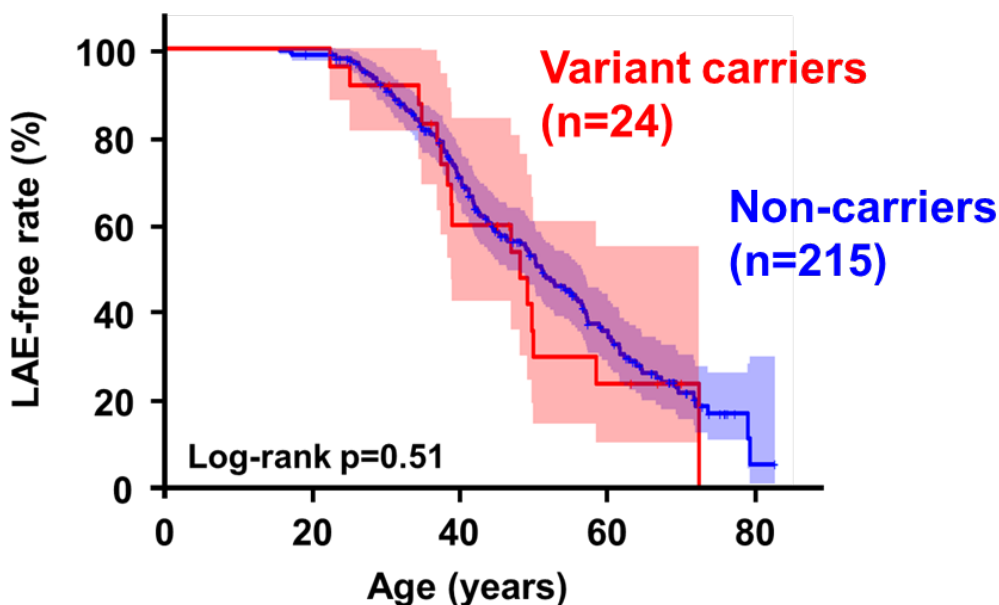

**Figure S7. Prognostic effects of rare variations of *SCN5A*-modulating BrS-associated genes.**

Kaplan-Meier analysis was performed to evaluate the LAE-free survival of BrS cohort-II probands with or without rare variants (A: MAF<1%; B: MAF<0.3%) of 8 *SCN5A*-modulating BrS-associated genes (*GPD1L*, *PKP2*, *MOG1*, *SCN10A*, *SCN1B*, *SCN2B*, *SCN3B*, and *SLMAP*). There were no significant differences in the prognosis of *SCN5A*(-) BrS probands regardless of the rare variations these genes in either cut-off MAF values. Probands without age information (n=49) were excluded from these analyses.

**Table S1. Allele frequency and functional outcomes of 55 *SCN5A* variations in BrS cohort-I**

**(A) *SCN5A* variations functionally characterized elsewhere previously or null variations (n=33)**

| Protein     | Position (GRCh37) | nucleotide              | Type of mutations | Location          | TM or non-TM   | Minor allele frequency |                     |              |                    | Reference | %Peak (A density (of WT) |                    |                            |                            |
|-------------|-------------------|-------------------------|-------------------|-------------------|----------------|------------------------|---------------------|--------------|--------------------|-----------|--------------------------|--------------------|----------------------------|----------------------------|
|             |                   |                         |                   |                   |                | gnomAD (global)        | gnomAD (East Asian) | 1000 Genomes | 4.7KJPN (Japanese) |           |                          |                    |                            |                            |
| R282H       | 3.38651314        | c.G845A                 | missense          | DI-S5/S6          | TM             | 1.62E-05               | 5.80E-05            | NR           | NR                 | 23        | 12%                      |                    |                            |                            |
| R367H       | 3.38648200        | c.G1100A                |                   | DI-S5/S6          | TM             | NR                     | NR                  |              |                    | 24        | nonfunctional            |                    |                            |                            |
| R376H       | 3.38648173        | c.G1127A                |                   | DI-S5/S6          | TM             | 1.09E-05               | NR                  |              |                    | 25        | 30%                      |                    |                            |                            |
| N406S       | 3.38647563        | c.A1217G                |                   | DI-S6             | TM             | NR                     | NR                  |              |                    | 8         | gating abnormality       |                    |                            |                            |
| F532C       | 3.38645498        | c.T1595G                |                   | IDL-I-II          | non-TM         | 1.63E-05               | 2.33E-04            |              |                    | 1.60E-03  | 26                       | 100%               |                            |                            |
| A735V       | 3.38639278        | c.C2204T                |                   | DII-S1            | TM             | 4.06E-06               | 5.80E-05            |              |                    | NR        | 27                       | 23%                |                            |                            |
| L846R       | 3.38627432        | c.T2537G                |                   | DII-S5/S6         | TM             | NR                     | NR                  |              |                    | NR        | 28                       | nonfunctional      |                            |                            |
| R878C       | 3.38627337        | c.C2632T                |                   | DII-S5/S6         | TM             | NR                     | NR                  |              |                    | NR        | 29                       | nonfunctional      |                            |                            |
| R893H       | 3.38627291        | c.G2678A                |                   | DII-S5/S6         | TM             | 4.06E-06               | NR                  |              |                    | NR        | 2                        | nonfunctional      |                            |                            |
| R1195H      | 3.38616870        | c.G3584A                |                   | IDL-II-III        | non-TM         | NR                     | NR                  |              |                    | NR        | 30                       | gating abnormality |                            |                            |
| V1328M      | 3.38601901        | c.G3982A                |                   | DIII-S4/S5        | TM             | NR                     | NR                  |              |                    | NR        | 31                       | gating abnormality |                            |                            |
| G1408R      | 3.38601661        | c.G4222A                |                   | DIII-S5/S6        | TM             | NR                     | NR                  |              |                    | NR        | 32                       | nonfunctional      |                            |                            |
| A1428S      | 3.38598739        | c.G4282T                |                   | DIII-S5/S6        | TM             | 2.84E-05               | 4.06E-04            |              |                    | 2.00E-04  | 33                       | 62%                |                            |                            |
| R1644C      | 3.38592933        | c.C4930T                |                   | DIV-S4            | TM             | 4.06E-06               | NR                  |              |                    | NR        | 34                       | gating abnormality |                            |                            |
| R1644H      | 3.38592932        | c.G4931A                |                   | DIV-S4            | TM             | NR                     | NR                  |              |                    | NR        | 35                       | late current       |                            |                            |
| G1743R      | 3.38592636        | c.G5227A                |                   | DIV-S5/S6         | TM             | NR                     | NR                  |              |                    | NR        | 36                       | nonfunctional      |                            |                            |
| E1784K      | 3.38592513        | c.G5350A                |                   | C-Terminal        | non-TM         | NR                     | NR                  |              |                    | NR        | 37                       | 60%                |                            |                            |
| del1380N    | 3.38601741        | c.4140_4142delCAA       |                   | in-frame deletion | DIII-S5/S6     | TM                     | NR                  |              |                    | NR        | NR                       | 38                 | nonfunctional              |                            |
| Q55X        | 3.38674636        | c.C163T                 |                   | nonsense          | N-terminal     | Not applicable         | NR                  |              |                    | NR        | NR                       | NR                 | 39                         | null (PVS1), nonfunctional |
| R179X       | 3.38662410        | c.C535T                 |                   |                   | DI-S2/S3       | NR                     | 4.07E-06            |              |                    | NR        | NR                       | 40                 | null (PVS1), nonfunctional |                            |
| W904X       | 3.38627258        | c.G2711A                |                   |                   | DII-S5/S6      | NR                     | NR                  |              |                    | NR        | NR                       | 41                 | null (PVS1), nonfunctional |                            |
| R1623X      | 3.38592996        | c.C4867T                |                   |                   | DIV-S4         | NR                     | NR                  |              |                    | NR        | NR                       | 42                 | null (PVS1), nonfunctional |                            |
| W1095X      | 3.38620931        | c.G3285A                |                   |                   | IDL-II-III     | NR                     | NR                  |              |                    | NR        | NR                       | NR                 | NR                         | NR                         |
| Y1409X      | 3.38601656        | c.C4227G                |                   |                   | DIII-S5/S6     | NR                     | NR                  |              |                    | NR        | NR                       | NR                 | NR                         | NR                         |
| N291TfsX52  | 3.38651289        | c.870delC               | frameshift        | DI-S5/S6          | Not applicable | NR                     | NR                  | NR           | NR                 | NR        | NA                       |                    |                            |                            |
| R513VfsX8   | 3.38645556        | c.1537delC              |                   | IDL-I-II          | NR             | NR                     | NR                  | NR           | NR                 | NR        |                          |                    |                            |                            |
| L1464WfsX5  | 3.38597973        | c.4389_4396del CCTGTTTA |                   | DIII-S6           | NR             | NR                     | NR                  | NR           | NR                 | NR        |                          |                    |                            |                            |
| L1579SfsX53 | 3.38595850        | c.4732_4733dupAA        |                   | DIV-S2/S3         | NR             | NR                     | NR                  | NR           | NR                 | NR        |                          |                    |                            |                            |
| I1720SfsX67 | 3.38592706        | c.5157delC              |                   | DIV-S5/S6         | NR             | NR                     | NR                  | NR           | NR                 | NR        |                          |                    |                            |                            |
| V1764SfsX23 | 3.38592573        | c.5290delG              |                   | DIV-S6            | NR             | NR                     | NR                  | NR           | NR                 | NR        |                          |                    |                            |                            |
| IVS21+1G>A  | 3.38607899        | c.3840+1G>A             | splice site       | DIII-S3           | NR             | 8.13E-06               | NR                  | NR           | NR                 | NR        | NR                       |                    |                            |                            |
| IVS23+1G>A  | 3.38601636        | c.4245+1G>A             |                   | DIII-S5/S6        | NR             | NR                     | NR                  | NR           | NR                 | NR        | NR                       |                    |                            |                            |
| IVS24+1delG | 3.38598721        | c.4299+1delG            |                   | DIII-S5/S6        | NR             | NR                     | NR                  | NR           | NR                 | NR        | NR                       |                    |                            |                            |

**(B) *SCN5A* VUS (n=22)**

| Protein | Position (GRCh37) | nucleotide | Type of mutations | Location   | TM or non-TM | Minor allele frequency |                     |              |                    | Reference |          |          |
|---------|-------------------|------------|-------------------|------------|--------------|------------------------|---------------------|--------------|--------------------|-----------|----------|----------|
|         |                   |            |                   |            |              | gnomAD (global)        | gnomAD (East Asian) | 1000 Genomes | 4.7KJPN (Japanese) |           |          |          |
| R104Q   | 3.38671883        | c.G311A    | missense          | N-terminal | non-TM       | NR                     | NR                  | NR           | NR                 | NA        |          |          |
| L136P   | 3.38663966        | c.T407C    |                   | DI-S1      | TM           | NR                     | NR                  |              |                    |           | NR       |          |
| L276Q   | 3.38651332        | c.T827A    |                   | DI-S5      | TM           | NR                     | NR                  |              |                    |           | NR       | NR       |
| Y416C   | 3.38647533        | c.A1247G   |                   | IDL-I-II   | non-TM       | 4.06E-06               | NR                  |              |                    |           | NR       | 3.00E-04 |
| E428K   | 3.38647498        | c.G1282A   |                   | IDL-I-II   | non-TM       | 5.42E-05               | 1.06E-04            |              |                    |           | NR       | 5.00E-04 |
| R689H   | 3.38639416        | c.G2066A   |                   | IDL-I-II   | non-TM       | 1.02E-04               | 1.16E-04            |              |                    |           | 2.00E-04 | NR       |
| R693C   | 3.38639405        | c.C2077T   |                   | IDL-I-II   | non-TM       | 5.69E-05               | 5.80E-05            |              |                    |           | NR       | NR       |
| Q779K   | 3.38628992        | c.C2335A   |                   | DII-S2/S3  | TM           | NR                     | NR                  |              |                    |           | NR       | 1.00E-04 |
| R814Q   | 3.38627528        | c.G2441A   |                   | DII-S4     | TM           | 2.55E-05               | 5.30E-05            |              |                    |           | NR       | NR       |
| R893C   | 3.38627292        | c.C2677T   |                   | DII-S5/S6  | TM           | 7.22E-06               | NR                  |              |                    |           | NR       | NR       |
| R988Q   | 3.38622687        | c.G2863A   |                   | IDL-II-III | non-TM       | 4.87E-05               | 5.44E-05            |              |                    |           | NR       | 1.00E-04 |
| H1200Y  | 3.38616856        | c.C3598T   |                   | IDL-II-III | non-TM       | NR                     | NR                  |              |                    |           | NR       | NR       |
| E1225K  | 3.38608067        | c.G3673A   |                   | DIII-S1/S2 | TM           | 4.06E-06               | NR                  |              |                    |           | NR       | NR       |
| T1247I  | 3.38608000        | c.C3740T   |                   | DIII-S2    | TM           | 3.25E-05               | NR                  |              |                    |           | NR       | NR       |
| V1405M  | 3.38601670        | c.G4213A   |                   | DIII-S5/S6 | TM           | NR                     | NR                  |              |                    |           | NR       | NR       |
| G1420R  | 3.38598763        | c.G4258C   |                   | DIII-S5/S6 | TM           | NR                     | NR                  |              |                    |           | NR       | NR       |
| R1432S  | 3.38598725        | c.G4296C   |                   | DIII-S5/S6 | TM           | NR                     | NR                  |              |                    |           | NR       | NR       |
| K1527R  | 3.38596003        | c.A4580G   |                   | DIV-S1     | TM           | NR                     | NR                  |              |                    |           | NR       | NR       |
| T1709M  | 3.38592737        | c.C5126T   |                   | DIV-S5/S6  | TM           | 4.06E-06               | NR                  |              |                    |           | NR       | NR       |
| R1913C  | 3.38592126        | c.C5737T   |                   | C-Terminal | non-TM       | 4.06E-06               | NR                  |              |                    |           | NR       | NR       |
| R1919H  | 3.38592107        | c.G5756A   |                   | C-Terminal | non-TM       | 8.12E-06               | NR                  |              |                    |           | 2.00E-04 | NR       |
| H1923D  | 3.38592096        | c.C5767G   |                   | C-Terminal | non-TM       | NR                     | NR                  |              |                    |           | NR       | NR       |

TM: Transmembrane region, D: Hydrophobic domain (DI-DIV) of Nav1.5, IDL: Interdomain linker region of Nav1.5, S: Transmembrane segment (S1-S6) of each domain of Nav1.5, NR: Not registered, NA: Not available, PVS1: null variants with very strong evidence of pathogenicity (ACMG-AMP)

**Table S2. Electrophysiological properties of 22 *SCN5A* VUSs in BrS cohort-I**

| SCN5A VUS (n) | Peak INa density, pA/pF (%WT)     | Activation                  |                         | Steady-state inactivation |                        | Recovery from inactivation |                        |                          |                          |                          | Functional category |                      |
|---------------|-----------------------------------|-----------------------------|-------------------------|---------------------------|------------------------|----------------------------|------------------------|--------------------------|--------------------------|--------------------------|---------------------|----------------------|
|               |                                   | V <sub>1/2</sub> (mV)       | k (mV)                  | V <sub>1/2</sub> (mV)     | k (mV)                 | τ <sub>fast</sub> (ms)     | τ <sub>slow</sub> (ms) | A <sub>fast</sub>        | A <sub>slow</sub>        | t <sub>1/2</sub> (ms)    |                     |                      |
| WT (14)       | 204.7 ± 89.2                      | -47.8 ± 3.7                 | -4.0 ± 0.8              | -85.9 ± 5.4               | 6.3 ± 0.4              | 13.8 ± 7.4                 | 100.5 ± 61.6           | 0.85 ± 0.05              | 0.13 ± 0.05              | 13.0 ± 7.1               | <b>WT</b>           |                      |
| G1420R (12)   | 1.3 ± 2.3 (0.6%) <sup>‡</sup>     | <b>Non-functional (n=4)</b> |                         |                           |                        |                            |                        |                          |                          |                          |                     |                      |
| L276Q (8)     | 1.8 ± 0.9 (0.9%) <sup>‡</sup>     |                             |                         |                           |                        |                            |                        |                          |                          |                          |                     |                      |
| R104Q (7)     | 2.1 ± 2.2 (1.0%) <sup>‡</sup>     |                             |                         |                           |                        |                            |                        |                          |                          |                          |                     |                      |
| R893C (9)     | 6.6 ± 4.3 (3.2%) <sup>‡</sup>     |                             |                         |                           |                        |                            |                        |                          |                          |                          |                     |                      |
| E1225K (18)   | 37.7 ± 23.3 (18.4%) <sup>‡</sup>  | -35.0 ± 2.7 <sup>†</sup>    | -4.7 ± 0.4              | -67.1 ± 4.2 <sup>†</sup>  | 5.5 ± 0.6 <sup>*</sup> | 3.4 ± 1.4 <sup>‡</sup>     | 37.9 ± 33.2            | 0.76 ± 0.13              | 0.20 ± 0.13              | 3.3 ± 1.3 <sup>‡</sup>   | <b>LOF (n=13)</b>   |                      |
| T1709M (9)    | 50.5 ± 29.2 (24.7%) <sup>‡</sup>  | -50.0 ± 3.2                 | -4.4 ± 0.8              | -89.7 ± 4.1               | 6.1 ± 1.0              | 13.9 ± 3.6                 | 515.7 ± 446.5          | 0.86 ± 0.07              | 0.13 ± 0.07              | 11.5 ± 2.3               |                     |                      |
| V1405M (14)   | 55.5 ± 42.1 (27.1%) <sup>‡</sup>  | -45.9 ± 5.7                 | -4.6 ± 1.0              | -85.5 ± 6.3               | 6.3 ± 1.7              | 26.1 ± 17.7                | 106.4 ± 118.3          | 0.73 ± 0.12              | 0.24 ± 0.11              | 21.7 ± 12.3              |                     |                      |
| Y416C (12)    | 71.1 ± 35.9 (34.7%) <sup>‡</sup>  | -48.0 ± 2.9                 | -6.2 ± 0.8 <sup>‡</sup> | -97.1 ± 6.5 <sup>‡</sup>  | 6.1 ± 0.7              | 46.6 ± 25.2 <sup>†</sup>   | 136.8 ± 83.2           | 0.77 ± 0.07 <sup>*</sup> | 0.21 ± 0.07 <sup>*</sup> | 35.4 ± 16.1 <sup>†</sup> |                     |                      |
| R1913C (13)   | 79.8 ± 41.8 (39%) <sup>‡</sup>    | -43.7 ± 3.0                 | -4.5 ± 0.7              | -88.6 ± 4.8               | 6.6 ± 0.9              | 18.3 ± 11.7                | 218.8 ± 191.1          | 0.82 ± 0.05              | 0.16 ± 0.04              | 13.8 ± 6.8               |                     |                      |
| L136P (13)    | 96.7 ± 53.9 (47.2%) <sup>‡</sup>  | -42.7 ± 3.7 <sup>‡</sup>    | -4.4 ± 0.7              | -83.5 ± 4.5               | 6.1 ± 0.7              | 12.0 ± 4.1                 | 141.6 ± 158.6          | 0.84 ± 0.06              | 0.13 ± 0.05              | 9.7 ± 2.7                |                     |                      |
| R1432S (12)   | 97 ± 47.6 (47.4%) <sup>‡</sup>    | -45.9 ± 2.4                 | -4.5 ± 0.5              | -88.1 ± 2.5               | 6.2 ± 0.6              | 22.5 ± 6.5                 | 222.4 ± 181.2          | 0.86 ± 0.05              | 0.13 ± 0.05              | 14.4 ± 2.1               |                     |                      |
| R1919H (11)   | 103.2 ± 53.3 (50.4%) <sup>‡</sup> | -52.3 ± 4.0                 | -4.7 ± 0.7              | -92.4 ± 6.0               | 6.8 ± 0.5              | 17.6 ± 11.1                | 159.7 ± 66.1           | 0.84 ± 0.04              | 0.15 ± 0.05              | 15.0 ± 9.0               |                     |                      |
| R693C (9)     | 108.9 ± 54.9 (53.2%) <sup>‡</sup> | -54.9 ± 2.8 <sup>†</sup>    | -4.6 ± 0.5              | -93.4 ± 5.0 <sup>†</sup>  | 6.4 ± 0.6              | 22.8 ± 10.1                | 411.7 ± 603.3          | 0.87 ± 0.04              | 0.12 ± 0.03              | 18.8 ± 8.2               |                     |                      |
| R988Q (14)    | 134.3 ± 77.1 (65.6%)              | -51.2 ± 3.9                 | -4.8 ± 0.4              | -90.0 ± 5.6               | 7.2 ± 0.8              | 13.9 ± 5.5                 | 145.9 ± 45.0           | 0.80 ± 0.06              | 0.19 ± 0.06              | 13.4 ± 5.6               |                     | <b>Non-LOF (n=9)</b> |
| R689H (9)     | 147.8 ± 64.2 (72.2%)              | -49.2 ± 4.5                 | -3.8 ± 0.6              | -86.9 ± 3.4               | 6.4 ± 0.7              | 12.8 ± 5.1                 | 102.3 ± 52.3           | 0.85 ± 0.06              | 0.14 ± 0.06              | 11.7 ± 4.3               |                     |                      |
| E428K (8)     | 153.5 ± 99.8 (75%)                | -51.6 ± 4.5                 | -3.7 ± 0.9              | -87.7 ± 2.5               | 6.4 ± 0.7              | 11.8 ± 3.5                 | 92.3 ± 57.7            | 0.84 ± 0.04              | 0.14 ± 0.04              | 10.0 ± 3.0               |                     |                      |
| Q779K (10)    | 157.7 ± 74.1 (77%)                | -45.8 ± 4.1                 | -4.3 ± 1.0              | -87.1 ± 6.0               | 6.2 ± 0.5              | 17.0 ± 9.0                 | 108.1 ± 47.4           | 0.84 ± 0.05              | 0.14 ± 0.05              | 13.9 ± 6.3               |                     |                      |
| H1200Y (10)   | 166 ± 37.1 (81.1%)                | -51.2 ± 4.3                 | -4.6 ± 0.4              | -88.7 ± 4.6               | 6.7 ± 0.7              | 14.0 ± 3.7                 | 121.1 ± 54.0           | 0.82 ± 0.04              | 0.16 ± 0.04              | 12.5 ± 3.7               |                     |                      |
| K1527R (7)    | 174.6 ± 65.0 (85.3%)              | -52.0 ± 3.3                 | -3.6 ± 0.5              | -87.2 ± 3.8               | 6.6 ± 0.3              | 14.8 ± 6.0                 | 107.8 ± 27.4           | 0.86 ± 0.11              | 0.12 ± 0.11              | 12.8 ± 7.8               |                     |                      |
| T1247I (12)   | 179.5 ± 48.3 (87.7%)              | -52.2 ± 2.1                 | -4.4 ± 0.7              | -87.3 ± 3.0               | 7.7 ± 0.6 <sup>‡</sup> | 17.1 ± 4.8                 | 180.6 ± 57.2           | 0.81 ± 0.03              | 0.18 ± 0.03              | 15.6 ± 4.3               |                     |                      |
| H1923D (12)   | 189.1 ± 62.7 (92.4%)              | -50.5 ± 4.5                 | -3.7 ± 0.5              | -86.4 ± 4.7               | 6.5 ± 0.7              | 16.0 ± 9.1                 | 154.7 ± 169.6          | 0.85 ± 0.05              | 0.14 ± 0.05              | 12.6 ± 6.2               |                     |                      |
| R814Q (12)    | 222.5 ± 89.3 (108.7%)             | -52.7 ± 3.0                 | -4.9 ± 0.5 <sup>*</sup> | -88.2 ± 3.9               | 7.5 ± 0.8 <sup>†</sup> | 18.3 ± 5.4                 | 273.3 ± 122.5          | 0.85 ± 0.02              | 0.14 ± 0.02              | 17.1 ± 4.2               |                     |                      |

LOF and Non-LOF: Variants with or without significantly reduced peak current densities than WT, respectively. The border zone of LOF/Non-LOF was between 53.2% (R693C) and 65.6% (R988Q). Statistical analysis was performed using one-way ANOVA followed by Bonferroni's post-hoc comparison test. \* <0.05; † <0.01; ‡ <0.001, LOF: loss-of-function

**Table S3. Experimental conditions of the current and previous patch clamp studies**

| Mutation      | Functional classification | Cell    | alpha subunit (GenBank) | beta subunit co-expression | Time after transfection | First author     | Year | Reference |
|---------------|---------------------------|---------|-------------------------|----------------------------|-------------------------|------------------|------|-----------|
| Current study |                           | HEK293T | NM_000335               | no                         | 24-48 hr                |                  |      |           |
| Q55X          | LOF                       | HEK293T | NM_000335               | no                         | ND                      | Makita           | 2007 | 39*       |
| R179X         |                           | HEK293  | NM_000335               | beta1                      | 24-48 hr                | Kawamura         | 2009 | 40        |
| W904X         |                           | ND      | NM_000335               | ND                         | ND                      | Makiyama         | 2010 | 41        |
| R1623X        |                           | HEK293  | NM_000335               | beta1                      | 24-72 hr                | Benson           | 2003 | 42        |
| R367H         |                           | HEK293T | NM_000335               | no                         | ND                      | Takehara         | 2004 | 24*       |
| L846R         |                           | HEK293T | NM_000335               | beta1                      | 24-72 hr                | Watanabe         | 2011 | 28*       |
| R878C         |                           | HEK293  | M77235                  | no/beta1                   | 24 hr                   | Zhang            | 2008 | 29        |
| R893H         |                           | ND      | ND                      | ND                         | ND                      | Kapplinger       | 2015 | 2         |
| del1380N      |                           | HEK293  | ND                      | no                         | ND                      | Yang             | 2017 | 38        |
| G1408R        |                           | COS-7   | ND                      | no/beta1                   | ND                      | Kyndt            | 2001 | 32        |
| G1743R        |                           | HEK293  | NM_000335               | no                         | 24-48hr                 | Valdivia         | 2004 | 36        |
| R282H         |                           | HEK293  | NM_000335               | beta1                      | ND                      | Itoh             | 2005 | 23        |
| R376H         |                           | HEK293  | ND                      | beta1                      | 48hr                    | Rossenbacker     | 2004 | 25        |
| A735V         |                           | HEK293  | ND                      | no                         | ND                      | de la Roche      | 2019 | 27        |
| A1428S        |                           | HEK293  | ND                      | no                         | ND                      | Zhu              | 2015 | 33        |
| E1784K        |                           | HEK293T | NM_000335               | beta1                      | 24-72 hr                | Makita           | 2008 | 37*       |
| N406S         |                           | Non-LOF | HEK293                  | NM_000335                  | beta1                   | ND               | Itoh | 2005      |
| R1195H        | HEK293                    |         | NM_000335               | no                         | 24 hr                   | Medeiros-Domingo | 2009 | 30        |
| V1328M        | HEK293                    |         | NM_000335               | no                         | 48-72 hr                | Turker           | 2016 | 31        |
| R1644C        | HEK293                    |         | ND                      | beta1                      | ND                      | Frustaci         | 2005 | 34        |
| R1644H        | HEK293T                   |         | ND                      | no                         | ND                      | Wang             | 1996 | 35        |
| F532C         | HEK293T                   |         | NM_000335               | beta1                      | 24-72 hr                | Otagiri          | 2008 | 26*       |

HEK293: Human Embryonic Kidney 293 cell, ND: Not described, \*: Our previous studies





**Table S5. ECG parameters of patients of different subgroups in BrS-cohort-I**

| Patient subgroups (n) |                             | P wave duration (ms) | PQ interval (ms) | QRS duration (ms) |              |              | S duration (ms) |             |
|-----------------------|-----------------------------|----------------------|------------------|-------------------|--------------|--------------|-----------------|-------------|
|                       |                             | II                   | II               | II                | V2           | V5           | II              | V5          |
| LOF (45)              |                             | 122.5 ± 25.8         | 221.4 ± 48.0     | 105.0 ± 27.0      | 112.8 ± 21.5 | 106.8 ± 24   | 38.4 ± 26.4     | 48.0 ± 24.4 |
| Non-LOF (15)          |                             | 101.5 ± 24.7         | 192.7 ± 30.6     | 92.1 ± 13.7       | 97.9 ± 16.9  | 90.5 ± 18.9  | 45.5 ± 28.1     | 40.4 ± 15.7 |
| SCN5A (-) (355)       |                             | 93.3 ± 14.8          | 175.8 ± 25.2     | 86.1 ± 16.7       | 93.7 ± 14.8  | 87.1 ± 16.8  | 31 ± 20.9       | 33.6 ± 19.4 |
| P values              | LOF vs Non-LOF vs SCN5A(-)  | <0.0001              | <0.0001          | <0.0001           | <0.0001      | <0.0001      | 0.02            | <0.0001     |
|                       | LOF vs Non-LOF              | 0.011                | 0.11             | 0.65              | 0.047        | 0.02         | 1               | 0.71        |
|                       | LOF vs SCN5A (-)            | <0.0001              | <0.0001          | <0.0001           | <0.0001      | <0.0001      | 0.16            | <0.0001     |
| Patient subgroups (n) |                             | S amplitude (mV)     |                  | RR interval (ms)  | QTc (ms)     |              |                 |             |
|                       |                             | II                   | V5               | II                | II           | V2           | V5              |             |
| LOF (45)              |                             | 0.3 ± 0.4            | 0.7 ± 1.0        | 921.5 ± 196.4     | 390.9 ± 35.6 | 405.2 ± 45.9 | 392.1 ± 34.5    |             |
| Non-LOF (15)          |                             | 0.3 ± 0.2            | 0.5 ± 0.4        | 867.7 ± 179.9     | 404.2 ± 33.9 | 410.4 ± 46.4 | 399.3 ± 32.1    |             |
| SCN5A (-) (355)       |                             | 0.5 ± 0.9            | 0.7 ± 1.3        | 896.7 ± 153.9     | 385.6 ± 28.8 | 389.3 ± 35.6 | 383.5 ± 29.7    |             |
| P values              | LOF vs Non-LOF vs SCN5A (-) | 0.76                 | 0.01             | 0.90              | 0.12         | 0.01         | 0.06            |             |
|                       | LOF vs Non-LOF              | NA                   | 1                | NA                | NA           | 1            | NA              |             |
|                       | LOF vs SCN5A (-)            | NA                   | 0.01             | NA                | NA           | 0.047        | NA              |             |

Statistical analysis was performed using Kruskal-Wallis test followed by Dunn's test. SCN5A(-): SCN5A mutation non-carriers, NA: Not Applicable.

**Table S6. Sensitivity analyses using bootstrap method**

| <b>A. LAEs in BrS-I subgroups classified by different SCN5A functional properties</b> |                                            |                                                                      |
|---------------------------------------------------------------------------------------|--------------------------------------------|----------------------------------------------------------------------|
| <b>Subgroups</b>                                                                      | <b>Annual event rate [%/year (95% CI)]</b> |                                                                      |
| All BrS                                                                               | 2.48 (1.85-3.12)                           |                                                                      |
| SCN5A (-)                                                                             | 2.17 (1.62-2.83)                           |                                                                      |
| SCN5A (+)                                                                             | 5.19 (2.37-8.49)                           |                                                                      |
| LOF                                                                                   | 8.29 (3.99-14.61)                          |                                                                      |
| Non-LOF                                                                               | 0                                          |                                                                      |
| Non-LOF+SCN5A (-)                                                                     | 2.10 (1.46-2.74)                           |                                                                      |
| <b>B. Univariate analysis</b>                                                         |                                            |                                                                      |
| <b>Variables</b>                                                                      | <b>HR (95% CI)</b>                         |                                                                      |
| History of aborted cardiac arrest                                                     | 6.77 (4.16-11.42)                          |                                                                      |
| LOF-SCN5A mutations                                                                   | 3.10 (1.57-5.76)                           |                                                                      |
| <i>In silico</i> -predicted rare SCN5A variants                                       | 2.09 (1.11-3.72)                           |                                                                      |
| History of syncope                                                                    | 2.04 (0.86-4.5)                            |                                                                      |
| Male                                                                                  | NA                                         |                                                                      |
| VT/VF by programmed electrical stimulation                                            | 1.76 (1.04-2.97)                           |                                                                      |
| Family history of sudden cardiac death                                                | 1.09 (0.50-1.98)                           |                                                                      |
| Documented atrial fibrillation                                                        | 1.82 (0.95-3.15)                           |                                                                      |
| Late potential positive                                                               | 1.54 (0.80-3.58)                           |                                                                      |
| Spontaneous type-I ST elevation                                                       | 1.38 (0.81-2.76)                           |                                                                      |
| QRS (V5)≥120 ms                                                                       | 2.53 (1.22-4.88)                           |                                                                      |
| P (II)≥120 ms                                                                         | 2.67 (1.41-4.63)                           |                                                                      |
| <b>C. Multivariate analysis</b>                                                       |                                            |                                                                      |
| <b>Variables</b>                                                                      | <b>LOF-SCN5A mutations [HR (95% CI)]</b>   | <b><i>In silico</i> -predicted rare SCN5A variants [HR (95% CI)]</b> |
| History of aborted cardiac arrest                                                     | 6.65 (3.5-11.94)                           | 6.75 (3.88-12.41)                                                    |
| SCN5A status                                                                          | 2.98 (1.31-6.08)                           | 2.06 (1.004-4.16)                                                    |
| QRS (V5)≥120 ms                                                                       | 1.13 (0.44-2.63)                           | 1.25 (0.43-2.96)                                                     |
| Documented atrial fibrillation                                                        | 0.99 (0.47-1.83)                           | 0.96 (0.47-1.82)                                                     |

NA: data not available

**Table S7. Rare variations (MAF<1%) of non-SCN5A BrS-associated genes identified by whole-exome sequencing in BrS cohort-II (n=288) and controls (n=372)**

| Chromosome | Position (GRCh37) | Reference allele | Alternative allele | Gene*    | call rate | Cases (n) | Controls (n) | Type of variant | Amino acid | dbSNP        | ClinVar                                      | Minor allele frequency |                   |             |          |          |
|------------|-------------------|------------------|--------------------|----------|-----------|-----------|--------------|-----------------|------------|--------------|----------------------------------------------|------------------------|-------------------|-------------|----------|----------|
|            |                   |                  |                    |          |           |           |              |                 |            |              |                                              | gnomAD-global          | gnomAD East Asian | 1000Genomes | 4.7KJPN  |          |
| 12         | 2,229,579         | G                | A                  | CACNA1C  | 99.7%     | 0         | 1            | missense        | A154T      |              |                                              | 1.2.E-05               | none              | none        | none     |          |
|            | 2,566,783         | C                | T                  |          | 99.7%     | 1         | 0            | missense        | A223V      |              |                                              |                        | none              | none        | none     | none     |
|            | 2,676,738         | C                | T                  |          | 99.7%     | 0         | 4            | missense        | T558M      | rs572234918  | Uncertain significance                       |                        | 1.2.E-04          | 9.3.E-04    | 6.0.E-04 | 6.0.E-04 |
|            | 2,700,761         | C                | G                  |          | 100.0%    | 2         | 2            | missense        | P1323A     | rs201551454  | Uncertain significance                       |                        | 5.7.E-05          | 3.6.E-04    | 2.0.E-04 | 2.8.E-03 |
|            | 2,788,865         | G                | T                  |          | 100.0%    | 1         | 1            | missense        | G1783C     | rs781633980  |                                              |                        | 1.2.E-05          | none        | none     | 1.6.E-03 |
|            | 2,789,572         | G                | A                  |          | 97.8%     | 1         | 1            | missense        | A1830T     |              |                                              |                        | 2.5.E-04          | none        | none     | none     |
|            | 2,791,780         | T                | A                  |          | 96.6%     | 0         | 1            | missense        | Y1908N     |              |                                              |                        | none              | none        | none     | none     |
|            | 2,797,760         | G                | A                  |          | 99.9%     | 0         | 1            | missense        | E2061K     |              |                                              |                        | 1.2.E-05          | none        | none     | none     |
| 7          | 81,746,437        | A                | G                  | CACNA2D1 | 99.6%     | 0         | 1            | missense        | I150T      |              |                                              | 4.0.E-06               | none              | none        | none     |          |
| 3          | 32,200,533        | G                | A                  | GPD1L    | 99.9%     | 2         | 0            | missense        | D262N      | rs746057191  |                                              | 1.4.E-05               | none              | none        | 1.0.E-04 |          |
| 15         | 73,615,370        | G                | A                  | HCN4     | 99.3%     | 0         | 1            | nonsense        | R1022X     |              |                                              | 2.7.E-05               | none              | none        | none     |          |
|            | 73,615,517        | C                | T                  |          | 99.3%     | 2         | 0            | missense        | G973R      |              |                                              |                        | 9.2.E-05          | none        | none     | none     |
|            | 73,615,589        | G                | A                  |          | 99.3%     | 2         | 2            | missense        | R949W      | rs755614529  |                                              |                        | 1.3.E-04          | 9.8.E-04    | none     | 1.8.E-03 |
|            | 73,616,270        | G                | A                  |          | 99.7%     | 1         | 0            | missense        | L722F      | rs774364558  |                                              |                        | 8.3.E-06          | 1.1.E-04    | none     | 2.0.E-04 |
|            | 73,617,719        | C                | T                  |          | 98.2%     | 1         | 0            | missense        | D553N      | rs104894485  | Pathogenic                                   |                        | 3.6.E-05          | none        | 2.0.E-04 | 8.0.E-04 |
|            | 73,622,030        | C                | T                  |          | 100.0%    | 1         | 0            | missense        | V492I      | rs772144022  |                                              |                        | 1.6.E-05          | 5.4.E-05    | none     | 2.0.E-04 |
|            | 73,622,056        | C                | T                  |          | 99.6%     | 0         | 1            | missense        | R483Q      | rs988387579  | Uncertain significance                       |                        | 3.2.E-05          | 4.5.E-04    | none     | 1.0.E-04 |
|            | 73,660,028        | G                | A                  |          | 97.2%     | 1         | 1            | missense        | A195V      | rs201375192  | Uncertain significance                       |                        | 3.7.E-04          | 4.9.E-03    | 8.0.E-04 | 9.0.E-04 |
| 1          | 112,525,026       | T                | C                  | KCND3    | 100.0%    | 1         | 0            | missense        | Y108C      |              |                                              | 4.0.E-06               | 5.4.E-05          | none        | 1.0.E-04 |          |
| 11         | 74,168,313        | C                | T                  | KCNE3    | 100.0%    | 0         | 1            | missense        | R99H       | rs121908441  | Conflicting interpretations of pathogenicity | 9.2.E-05               | 2.0.E-04          | 6.0.E-04    | 9.0.E-04 |          |
|            | 74,168,599        | T                | C                  |          | 98.5%     | 0         | 1            | missense        | T4A        | rs200856070  | Conflicting interpretations of pathogenicity |                        | 1.3.E-04          | 1.8.E-03    | 6.0.E-04 | 9.0.E-04 |
| 7          | 150,647,198       | G                | A                  | KCNH2    | 100.0%    | 1         | 0            | missense        | A819V      | rs774109163  |                                              | 4.0.E-06               | none              | none        | none     |          |
|            | 150,656,677       | G                | A                  |          | 98.7%     | 1         | 0            | missense        | T152I      |              |                                              |                        | 4.0.E-06          | none        | none     | none     |
|            | 150,656,690       | G                | A                  |          | 98.7%     | 0         | 1            | missense        | R148W      | rs139544114  | Conflicting interpretations of pathogenicity |                        | 1.1.E-03          | none        | none     | 2.0.E-04 |
|            | 150,656,717       | C                | T                  |          | 100.0%    | 0         | 1            | missense        | G139R      |              |                                              |                        | 8.0.E-06          | none        | none     | none     |
| 12         | 21,919,112        | G                | A                  | KCNJ8    | 100.0%    | 0         | 1            | missense        | R274C      |              |                                              | 3.2.E-05               | none              | none        | 5.0.E-04 |          |
|            | 21,926,454        | T                | C                  |          | 100.0%    | 0         | 1            | missense        | K33E       |              |                                              |                        | none              | none        | none     | 5.0.E-04 |
| 12         | 32,949,098        | C                | T                  | PKP2     | 96.4%     | 3         | 4            | missense        | DB12N      | rs200947767  | Uncertain significance                       |                        | 5.3.E-05          | 2.0.E-04    | 4.0.E-04 | 2.7.E-03 |
|            | 32,949,229        | T                | G                  |          | 98.4%     | 1         | 3            | missense        | K768T      | rs201487421  | Uncertain significance                       |                        | 5.6.E-05          | 7.7.E-04    | 6.0.E-04 | 3.7.E-03 |
|            | 33,030,829        | T                | C                  |          | 99.9%     | 2         | 0            | missense        | S329G      | rs779173447  |                                              |                        | 1.1.E-05          | none        | none     | 3.0.E-04 |
|            | 33,031,089        | G                | A                  |          | 100.0%    | 2         | 2            | missense        | T242M      | rs201580443  | Uncertain significance                       |                        | 1.2.E-04          | 1.2.E-03    | 2.0.E-04 | 1.3.E-03 |
| 17         | 8,192,348         | T                | C                  | MOG1     | 99.7%     | 0         | 1            | missense        | L51P       |              |                                              |                        | none              | none        | none     | none     |
|            | 8,192,767         | G                | A                  |          | 100.0%    | 0         | 3            | missense        | G129D      |              |                                              |                        | none              | none        | none     | none     |
|            | 38,739,034        | C                | T                  |          | 100.0%    | 0         | 1            | missense        | G1893S     |              |                                              |                        | none              | none        | none     | none     |
|            | 38,739,106        | G                | A                  |          | 100.0%    | 0         | 4            | missense        | R1869C     | rs141648641  | Likely benign                                |                        | 9.1.E-04          | 1.5.E-03    | 2.0.E-04 | 1.9.E-03 |
|            | 38,739,123        | C                | T                  |          | 100.0%    | 2         | 0            | missense        | R1863Q     | rs191869263  |                                              |                        | 2.4.E-05          | 2.7.E-04    | 2.0.E-04 | 5.0.E-04 |
|            | 38,739,175        | G                | T                  |          | 100.0%    | 1         | 1            | missense        | L1846I     | rs1001583386 |                                              |                        | none              | none        | none     | 2.3.E-03 |
|            | 38,739,595        | T                | C                  |          | 100.0%    | 0         | 3            | missense        | I1706V     |              |                                              |                        | none              | none        | none     | none     |
|            | 38,739,664        | G                | A                  |          | 100.0%    | 5         | 2            | missense        | P1683S     | rs146999807  | Benign                                       |                        | 9.0.E-04          | 8.4.E-03    | 2.4.E-03 | 6.1.E-03 |
|            | 38,739,687        | G                | A                  |          | 100.0%    | 0         | 1            | missense        | P1675L     | rs564943632  |                                              |                        | 4.0.E-06          | none        | 6.0.E-04 | 3.0.E-04 |
|            | 38,740,013        | G                | C                  |          | 98.1%     | 0         | 1            | nonsense        | Y1566X     |              |                                              |                        | none              | none        | none     | none     |
|            | 38,740,041        | G                | GA                 |          | 98.1%     | 1         | 0            | frameshift      | S1559FfsX4 |              |                                              |                        | 4.0.E-06          | none        | none     | 1.0.E-04 |
|            | 38,752,339        | C                | T                  |          | 97.3%     | 2         | 0            | missense        | R1380Q     | rs149155352  | Uncertain significance                       |                        | 7.1.E-05          | none        | 2.0.E-04 | 1.4.E-03 |
|            | 38,753,757        | G                | T                  |          | 99.9%     | 1         | 0            | missense        | N1328K     | rs1204063286 |                                              |                        | none              | none        | none     | 4.0.E-04 |
| 38,753,897 | T                 | C                | 99.1%              | 0        | 1         | missense  | M1282V       | rs1006794198    |            |              | none                                         | none                   | none              | 5.0.E-04    |          |          |
| 38,760,283 | G                 | A                | 99.7%              | 4        | 5         | missense  | T1181M       | rs150773437     | Benign     |              | 7.2.E-04                                     | 9.3.E-03               | 2.2.E-03          | 3.2.E-03    |          |          |

Table S7 (continue)

| Chromosome | Position (GRCh37) | Reference allele                         | Alternative allele | Gene * | call rate | Cases (n) | Controls (n) | Type of variant | Amino acid  | dbSNP                  | ClinVar                                      | Minor allele frequency |                   |             |          |          |          |
|------------|-------------------|------------------------------------------|--------------------|--------|-----------|-----------|--------------|-----------------|-------------|------------------------|----------------------------------------------|------------------------|-------------------|-------------|----------|----------|----------|
|            |                   |                                          |                    |        |           |           |              |                 |             |                        |                                              | gnomAD-global          | gnomAD East Asian | 1000Genomes | 4.7KJPN  |          |          |
| 3          | 38,760,318        | C                                        | T                  | SCN10A | 98.1%     | 0         | 1            | splicing        | c.3508-1C>T |                        |                                              | none                   | none              | none        | none     |          |          |
|            | 38,770,142        | C                                        | T                  |        | 99.3%     | 0         | 1            | missense        | R844H       | rs562091549            |                                              |                        | 2.4.E-05          | none        | 2.0.E-04 | 5.0.E-04 |          |
|            | 38,770,188        | G                                        | A                  |        | 100.0%    | 1         | 0            | missense        | R829C       | rs755974168            |                                              |                        | 4.0.E-06          | none        | none     | 1.0.E-04 |          |
|            | 38,770,244        | C                                        | T                  |        | 100.0%    | 0         | 1            | missense        | G810E       |                        |                                              |                        | none              | none        | none     | none     |          |
|            | 38,770,349        | G                                        | A                  |        | 100.0%    | 1         | 0            | missense        | I775I       | rs150501065            |                                              |                        | 1.7.E-04          | 2.3.E-03    | 4.0.E-04 | 4.0.E-04 |          |
|            | 38,783,842        | C                                        | T                  |        | 97.3%     | 0         | 1            | missense        | M682I       |                        |                                              |                        | none              | none        | none     | none     |          |
|            | 38,793,756        | T                                        | G                  |        | 98.1%     | 0         | 1            | missense        | Q570P       |                        |                                              |                        | none              | none        | none     | 2.0.E-04 |          |
|            | 38,793,972        | C                                        | T                  |        | 99.0%     | 1         | 0            | missense        | R498Q       |                        |                                              |                        | 1.9.E-04          | 2.6.E-04    | 4.0.E-04 | none     |          |
|            | 38,798,298        | A                                        | C                  |        | 99.3%     | 6         | 4            | missense        | F386C       | rs78555408             | Benign                                       |                        | 4.9.E-04          | 6.7.E-03    | 1.8.E-03 | 3.7.E-03 |          |
|            | 38,798,514        | G                                        | T                  |        | 99.1%     | 2         | 0            | missense        | Q363K       | rs772926214            |                                              |                        | 2.0.E-05          | 2.2.E-04    | none     | 6.0.E-04 |          |
|            | 38,812,783        | C                                        | T                  |        | 98.5%     | 0         | 1            | missense        | V196I       |                        |                                              |                        | 4.0.E-06          | none        | none     | none     |          |
|            | 38,812,804        | A                                        | G                  |        | 99.3%     | 0         | 1            | missense        | W189R       | rs1379282429           |                                              |                        | none              | none        | none     | 5.0.E-04 |          |
|            | 38,833,581        | T                                        | G                  |        | 97.5%     | 0         | 1            | missense        | N117H       | rs774462243            |                                              |                        | 6.0.E-05          | 8.5.E-04    | none     | 6.0.E-04 |          |
|            | 38,835,449        | G                                        | A                  |        | 100.0%    | 3         | 1            | missense        | P18L        | rs190176472            | Benign                                       |                        | 3.3.E-04          | 4.5.E-03    | 6.0.E-04 | 6.0.E-03 |          |
| 19         | 35,524,682        | C                                        | T                  | SCN1B  | 100.0%    | 0         | 1            | missense        | R163W       |                        |                                              | 4.8.E-05               | 1.6.E-04          | none        | none     |          |          |
|            | 35,524,755        | G                                        | A                  |        | 100.0%    | 7         | 6            | missense        | R187H       | rs72558026             | Conflicting interpretations of pathogenicity |                        | 1.4.E-03          | 9.6.E-03    | 4.8.E-03 | 7.1.E-03 |          |
|            | 35,524,868        | C                                        | T                  |        | 100.0%    | 1         | 0            | missense        | R225C       |                        |                                              |                        | 1.2.E-04          | none        | 2.0.E-04 | none     |          |
|            | 35,524,980        | G                                        | A                  |        | 100.0%    | 0         | 1            | missense        | C262Y       | rs369032304            | Uncertain significance                       |                        | 1.6.E-04          | 2.2.E-03    | none     | 1.0.E-04 |          |
|            | 35,530,138        | C                                        | T                  |        | 99.4%     | 0         | 1            | missense        | T189M       |                        |                                              |                        | 1.9.E-04          | 1.9.E-03    | 6.0.E-04 | 5.0.E-04 |          |
| 11         | 118,038,968       | G                                        | A                  | SCN2B  | 100.0%    | 0         | 1            | missense        | R94W        | rs760016611            |                                              | 1.8.E-05               | 5.0.E-05          | none        | none     |          |          |
|            | 118,038,998       | G                                        | A                  | 100.0% | 0         | 1         | missense     | R84C            | rs760669515 | Uncertain significance |                                              | 6.4.E-05               | 1.6.E-04          | none        | 4.0.E-04 |          |          |
| 11         | 123,513,271       | C                                        | T                  | SCN3B  | 100.0%    | 2         | 2            | missense        | V110I       | rs147205617            | Conflicting interpretations of pathogenicity |                        | 3.1.E-04          | 2.6.E-03    | 4.0.E-04 | 2.4.E-03 |          |
|            | 123,516,452       | A                                        | G                  | 96.6%  | 0         | 2         | missense     | V21A            | rs749596563 |                        |                                              | 1.2.E-05               | 1.6.E-04          | none        | 2.1.E-03 |          |          |
| 7          | 83,640,592        | T                                        | G                  | SEMA3A | 99.4%     | 0         | 1            | missense        | S278R       |                        |                                              | none                   | none              | none        | 1.0.E-04 |          |          |
|            | 83,643,590        | C                                        | T                  | 98.7%  | 1         | 0         | missense     | E249K           |             |                        |                                              | none                   | none              | none        | none     |          |          |
| 3          | 57,743,404        | C                                        | G                  | SLMAP  | 97.8%     | 1         | 0            | missense        | T9S         |                        |                                              | none                   | none              | none        | none     |          |          |
|            | 57,902,725        | A                                        | C                  |        | 99.4%     | 1         | 1            | missense        | E727A       | rs765326482            |                                              |                        | 6.0.E-05          | 8.2.E-04    | none     | 1.6.E-03 |          |
|            | 57,902,737        | G                                        | A                  |        | 99.4%     | 0         | 2            | missense        | R731Q       | rs141277984            |                                              |                        | 2.0.E-05          | none        | none     | 9.0.E-04 |          |
|            | 57,908,734        | G                                        | A                  |        | 98.4%     | 0         | 1            | missense        | R793Q       | rs55766107             |                                              |                        | 2.1.E-05          | none        | none     | none     |          |
|            | 57,913,071        | G                                        | A                  |        | 97.6%     | 0         | 1            | missense        | A815T       | rs1210310709           |                                              |                        | 7.2.E-06          | none        | none     | none     |          |
| 19         | 49,661,513        | C                                        | T                  | TRPM4  | 100.0%    | 1         | 1            | missense        | P30L        | rs200868666            |                                              |                        | 4.0.E-06          | 5.4.E-05    | 2.0.E-04 | 7.0.E-04 |          |
|            | 49,674,674        | C                                        | T                  |        | 99.9%     | 1         | 0            | missense        | T286M       |                        |                                              |                        | 7.2.E-05          | 1.1.E-04    | none     | none     |          |
|            | 49,674,854        | A                                        | G                  |        | 99.9%     | 1         | 0            | missense        | Q293R       | rs172147855            |                                              |                        | 1.8.E-04          | 1.1.E-03    | 8.0.E-04 | 5.0.E-04 |          |
|            | 49,674,962        | G                                        | A                  |        | 99.7%     | 1         | 1            | missense        | G329D       | rs1438186663           |                                              |                        | none              | none        | none     | 4.0.E-04 |          |
|            | 49,684,674        | GA                                       | G                  |        | 99.7%     | 0         | 1            | frameshift      | D407AfsX27  |                        |                                              |                        | none              | none        | none     | 2.0.E-04 |          |
|            | 49,684,714        | G                                        | A                  |        | 96.3%     | 1         | 0            | nonsense        | W420X       | rs746740271            |                                              |                        | none              | none        | none     | 1.0.E-04 |          |
|            | 49,685,946        | C                                        | T                  |        | 100.0%    | 1         | 2            | missense        | R459C       | rs762730503            |                                              |                        | 3.2.E-05          | 4.4.E-04    | none     | 2.0.E-04 |          |
|            | 49,686,061        | A                                        | G                  |        | 100.0%    | 0         | 1            | missense        | E497G       | rs753611182            |                                              |                        | 2.4.E-05          | 2.2.E-04    | none     | 5.0.E-04 |          |
|            | 49,686,103        | T                                        | A                  |        | 99.4%     | 0         | 4            | missense        | L511Q       | rs200508171            | Uncertain significance                       |                        | 5.5.E-05          | 4.1.E-06    | 2.0.E-04 | 3.7.E-03 |          |
|            | 49,691,902        | C                                        | T                  |        | 100.0%    | 0         | 1            | missense        | S583F       |                        |                                              |                        | none              | none        | none     | none     |          |
|            | 49,693,975        | C                                        | T                  |        | 99.9%     | 1         | 0            | missense        | R719W       |                        |                                              |                        | 4.0.E-05          | none        | none     | none     |          |
|            | 49,699,988        | C                                        | G                  |        | 97.9%     | 0         | 2            | missense        | S480R       | rs749938388            |                                              |                        | 1.1.E-04          | 1.4.E-03    | none     | 8.0.E-04 |          |
|            | 49,703,600        | A                                        | G                  |        | 100.0%    | 1         | 4            | missense        | I897V       | rs201172677            |                                              |                        | 4.0.E-07          | 4.9.E-04    | 2.0.E-04 | 3.0.E-03 |          |
|            | 49,705,251        | CGGAGCCCG<br>GCTTCTGGG<br>CACACCTC<br>CT |                    |        | C         | 99.4%     | 0            | 4               | frameshift  | L996PfsX8              | rs765535147                                  | Uncertain significance |                   | 6.0.E-05    | 3.0.E-04 | none     | 1.3.E-03 |

\*; Rare variations of other BrS-associated genes (*ABCC9*, *ANK2*, *CACNB2*, *KCNE5*, *FGF12*) were absent in cases or controls

**Table S8. Gene-wise rare variant association test for non-SCN5A BrS-associated genes with limited or disputed evidence**

| BrS-associated genes    |                             | Cases (n=288) |    | Controls (n=372) |     | P-values |
|-------------------------|-----------------------------|---------------|----|------------------|-----|----------|
| Non-SCN5A genes (n=17)* | SCN5A-modifying genes (n=8) | frequency     | n  | frequency        | n   |          |
| <i>CACNA1C</i>          |                             | 1.7%          | 5  | 3.8%             | 11  | 0.45     |
| <i>CACNA2D1</i>         |                             | 0.0%          | 0  | 0.3%             | 1   | 1.00     |
| <i>GPD1L</i>            | <i>GPD1L</i>                | 0.7%          | 2  | 0.0%             | 0   | 0.19     |
| <i>HCN4</i>             |                             | 2.8%          | 8  | 1.7%             | 5   | 0.26     |
| <i>KCND3</i>            |                             | 0.3%          | 1  | 0.0%             | 0   | 0.44     |
| <i>KCNE3</i>            |                             | 0.0%          | 0  | 0.7%             | 2   | 0.51     |
| <i>KCNH2</i>            |                             | 0.7%          | 2  | 0.7%             | 2   | 1.00     |
| <i>KCNJ8</i>            |                             | 0.0%          | 0  | 0.7%             | 2   | 0.51     |
| <i>PKP2</i>             | <i>PKP2</i>                 | 2.8%          | 8  | 3.1%             | 9   | 0.81     |
| <i>MOG1</i>             | <i>MOG1</i>                 | 0.0%          | 0  | 1.4%             | 4   | 0.14     |
| <i>SCN10A</i>           | <i>SCN10A</i>               | 10.4%         | 30 | 11.1%            | 32  | 0.50     |
| <i>SCN1B</i>            | <i>SCN1B</i>                | 2.8%          | 8  | 3.1%             | 9   | 0.81     |
| <i>SCN2B</i>            | <i>SCN2B</i>                | 0.0%          | 0  | 0.7%             | 2   | 0.51     |
| <i>SCN3B</i>            | <i>SCN3B</i>                | 0.7%          | 2  | 1.4%             | 4   | 0.70     |
| <i>SEMA3A</i>           |                             | 0.3%          | 1  | 0.3%             | 1   | 1.00     |
| <i>SLMAP</i>            | <i>SLMAP</i>                | 0.7%          | 2  | 1.7%             | 5   | 0.48     |
| <i>TRPM4</i>            |                             | 2.8%          | 8  | 7.3%             | 21  | 0.09     |
| total                   |                             |               | 77 |                  | 110 |          |

Statistical analysis was performed with Fisher's exact test. \*; Rare variations of other BrS-associated genes (*ABCC9*, *ANK2*, *CACNB2*, *KCNE5*, *FGF12*) were absent in cases or controls.

## REFERENCES

1. Yamagata K, Horie M, Aiba T, Ogawa S, Aizawa Y, Ohe T, Yamagishi M, Makita N, Sakurada H, Tanaka T, Shimizu A, Hagiwara N, Kishi R, Nakano Y, Takagi M, Makiyama T, Ohno S, Fukuda K, Watanabe H, Morita H, Hayashi K, Kusano K, Kamakura S, Yasuda S, Ogawa H, Miyamoto Y, Kapplinger JD, Ackerman MJ, Shimizu W. Genotype-Phenotype Correlation of *SCN5A* Mutation for the Clinical and Electrocardiographic Characteristics of Probands With Brugada Syndrome: A Japanese Multicenter Registry. *Circulation* 2017;135:2255-2270.
2. Kapplinger JD, Giudicessi JR, Ye D, Tester DJ, Callis TE, Valdivia CR, Makielski JC, Wilde AA, Ackerman MJ. Enhanced Classification of Brugada Syndrome-Associated and Long-QT Syndrome-Associated Genetic Variants in the *SCN5A*-Encoded Na(v)1.5 Cardiac Sodium Channel. *Circ Cardiovasc Genet* 2015;8:582-95.
3. Genome Aggregation Database. <https://gnomad.broadinstitute.org/>
4. 1000 Human Genomes Project Database. <https://www.internationalgenome.org/1000-genomes-browsers/>
5. Integrative Japanese Genome Variation Database from Tohoku Medical Megabank (4.7KJPN). <https://jmorp.megabank.tohoku.ac.jp/202001/>
6. Richards S, Aziz N, Bale S, Bick D, Das S, Gastier-Foster J, Grody WW, Hegde M, Lyon E, Spector E, Voelkerding K, Rehm HL, Committee ALQA. Standards and guidelines for the interpretation of sequence variants: a joint consensus recommendation of the American College of Medical Genetics and Genomics and the Association for Molecular Pathology. *Genet Med* 2015;17:405-24.
7. Abe K, Machida T, Sumitomo N, Yamamoto H, Ohkubo K, Watanabe I, Makiyama T, Fukae S, Kohno M, Harrell DT, Ishikawa T, Tsuji Y, Nogami A, Watabe T, Oginosawa Y, Abe H, Maemura K, Motomura H, Makita N. Sodium channelopathy underlying familial sick sinus syndrome with early onset and predominantly male characteristics. *Circ Arrhythm Electrophysiol* 2014;7:511-7.
8. Itoh H, Shimizu M, Takata S, Mabuchi H, Imoto K. A novel missense mutation in the *SCN5A* gene associated with Brugada syndrome bidirectionally affecting blocking actions of antiarrhythmic drugs. *J Cardiovasc Electrophysiol* 2005;16:486-93.
9. R Core Team (2020) R: A language and environment for statistical computing. R Foundation for Statistical Computing, Vienna, Austria. <http://www.r-project.org/index.html>
10. Davison A, Hinkley D. *Bootstrap Methods and Their Applications*. Cambridge: Cambridge University Press; 1997.
11. Canty A, Ripley B. boot: Bootstrap R (S-Plus) Functions. R package version 1.3-27. 2021.
12. Therneau T (2020). A Package for Survival Analysis in R. R package version 3.2-7 <https://CRAN.R-project.org/package=survival>
13. Morimoto Y, Shimada-Sugimoto M, Otowa T, Yoshida S, Kinoshita A, Mishima H, Yamaguchi N, Mori T, Imamura A, Ozawa H, Kurotaki N, Ziegler C, Domschke K, Deckert J, Umekage T, Tochigi M, Kaiya H, Okazaki Y, Tokunaga K, Sasaki T, Yoshiura KI, Ono S. Whole-exome sequencing and gene-based

rare variant association tests suggest that PLA2G4E might be a risk gene for panic disorder. *Transl Psychiatry* 2018;8:41.

14. ExAC. <https://gnomad.broadinstitute.org/>
15. ESP6500. <https://evs.gs.washington.edu/EVS/>
16. Human Genetic Variation Database (HGVD). <http://www.hgvd.genome.med.kyoto-u.ac.jp/>
17. Integrative Japanese Genome Variation Database from Tohoku Medical Megabank (2KJPN). <https://jmorp.megabank.tohoku.ac.jp/202001/downloads/legacy/#variant>
18. GENCODE. [https://www.encodegenes.org/human/release\\_19.html](https://www.encodegenes.org/human/release_19.html)
19. Li B, Leal SM. Methods for detecting associations with rare variants for common diseases: application to analysis of sequence data. *Am J Hum Genet* 2008;83:311-21.
20. Madsen BE, Browning SR. A groupwise association test for rare mutations using a weighted sum statistic. *PLoS Genet* 2009;5:e1000384.
21. Lee S, Wu MC, Lin X. Optimal tests for rare variant effects in sequencing association studies. *Biostatistics* 2012;13:762-75.
22. Efficient and Parallelizable Association Container Toolbox (EPACTS) <https://github.com/statgen/EPACTS>
23. Itoh H, Shimizu M, Mabuchi H, Imoto K. Clinical and electrophysiological characteristics of Brugada syndrome caused by a missense mutation in the S5-pore site of SCN5A. *J Cardiovasc Electrophysiol* 2005;16:378-83.
24. Takehara N, Makita N, Kawabe J, Sato N, Kawamura Y, Kitabatake A, Kikuchi K. A cardiac sodium channel mutation identified in Brugada syndrome associated with atrial standstill. *J Intern Med* 2004;255:137-42.
25. Rossenbacker T, Carroll SJ, Liu H, Kuiperi C, de Ravel TJ, Devriendt K, Carmeliet P, Kass RS, Heidbuchel H. Novel pore mutation in SCN5A manifests as a spectrum of phenotypes ranging from atrial flutter, conduction disease, and Brugada syndrome to sudden cardiac death. *Heart Rhythm* 2004;1:610-5.
26. Otagiri T, Kijima K, Osawa M, Ishii K, Makita N, Matoba R, Umetsu K, Hayasaka K. Cardiac ion channel gene mutations in sudden infant death syndrome. *Pediatr Res* 2008;64:482-7.
27. de la Roche J, Angsutararux P, Kempf H, Janan M, Bolesani E, Thiemann S, Wojciechowski D, Coffee M, Franke A, Schwanke K, Leffler A, Luanpitpong S, Issaragrisil S, Fischer M, Zweigerdt R. Comparing human iPSC-cardiomyocytes versus HEK293T cells unveils disease-causing effects of Brugada mutation A735V of NaV1.5 sodium channels. *Sci Rep* 2019;9:11173.
28. Watanabe H, Nogami A, Ohkubo K, Kawata H, Hayashi Y, Ishikawa T, Makiyama T, Nagao S, Yagihara N, Takehara N, Kawamura Y, Sato A, Okamura K, Hosaka Y, Sato M, Fukae S, Chinushi M, Oda H, Okabe M, Kimura A, Maemura K, Watanabe I, Kamakura S, Horie M, Aizawa Y, Shimizu W, Makita N. Electrocardiographic characteristics and SCN5A mutations in idiopathic ventricular fibrillation associated with early repolarization. *Circ Arrhythm Electrophysiol* 2011;4:874-81.
29. Zhang Y, Wang T, Ma A, Zhou X, Gui J, Wan H, Shi R, Huang C, Grace AA, Huang CL, Trump D,



- Zhang H, Zimmer T, Lei M. Correlations between clinical and physiological consequences of the novel mutation R878C in a highly conserved pore residue in the cardiac Na<sup>+</sup> channel. *Acta Physiol (Oxf)* 2008;194:311-23.
30. Medeiros-Domingo A, Tan BH, Iturralde-Torres P, Tester DJ, Tusie-Luna T, Makielski JC, Ackerman MJ. Unique mixed phenotype and unexpected functional effect revealed by novel compound heterozygosity mutations involving SCN5A. *Heart Rhythm* 2009;6:1170-5.
  31. Turker I, Makiyama T, Vatta M, Itoh H, Ueyama T, Shimizu A, Ai T, Horie M. A Novel SCN5A Mutation Associated with Drug Induced Brugada Type ECG. *PLoS One* 2016;11:e0161872.
  32. Kyndt F, Probst V, Potet F, Demolombe S, Chevallier JC, Baro I, Moisan JP, Boisseau P, Schott JJ, Escande D, Le Marec H. Novel SCN5A mutation leading either to isolated cardiac conduction defect or Brugada syndrome in a large French family. *Circulation* 2001;104:3081-6.
  33. Zhu JF, Du LL, Tian Y, Du YM, Zhang L, Zhou T, Tian LI. Novel heterozygous mutation c.4282G>T in the SCN5A gene in a family with Brugada syndrome. *Exp Ther Med* 2015;9:1639-1645.
  34. Frustaci A, Priori SG, Pieroni M, Chimenti C, Napolitano C, Rivolta I, Sanna T, Bellocci F, Russo MA. Cardiac histological substrate in patients with clinical phenotype of Brugada syndrome. *Circulation* 2005;112:3680-7.
  35. Wang DW, Yazawa K, George AL, Jr., Bennett PB. Characterization of human cardiac Na<sup>+</sup> channel mutations in the congenital long QT syndrome. *Proc Natl Acad Sci U S A* 1996;93:13200-5.
  36. Valdivia CR, Tester DJ, Rok BA, Porter CB, Munger TM, Jahangir A, Makielski JC, Ackerman MJ. A trafficking defective, Brugada syndrome-causing SCN5A mutation rescued by drugs. *Cardiovasc Res* 2004;62:53-62.
  37. Makita N, Behr E, Shimizu W, Horie M, Sunami A, Crotti L, Schulze-Bahr E, Fukuhara S, Mochizuki N, Makiyama T, Itoh H, Christiansen M, McKeown P, Miyamoto K, Kamakura S, Tsutsui H, Schwartz PJ, George AL, Jr., Roden DM. The E1784K mutation in *SCN5A* is associated with mixed clinical phenotype of type 3 long QT syndrome. *J Clin Invest* 2008;118:2219-29.
  38. Yang Z, Lu D, Zhang L, Hu J, Nie Z, Xie C, Qiu F, Cheng H, Yan Y. p.N1380del mutation in the pore-forming region of SCN5A gene is associated with cardiac conduction disturbance and ventricular tachycardia. *Acta Biochim Biophys Sin (Shanghai)* 2017;49:270-276.
  39. Makita N, Sumitomo N, Watanabe I, Tsutsui H. Novel SCN5A mutation (Q55X) associated with age-dependent expression of Brugada syndrome presenting as neurally mediated syncope. *Heart Rhythm* 2007;4:516-9.
  40. Kawamura M, Ozawa T, Yao T, Ashihara T, Sugimoto Y, Yagi T, Itoh H, Ito M, Makiyama T, Horie M. Dynamic change in ST-segment and spontaneous occurrence of ventricular fibrillation in Brugada syndrome with a novel nonsense mutation in the SCN5A gene during long-term follow-up. *Circ J* 2009;73:584-8.
  41. Makiyama T, Shizuta S, Akao M, Kimura T, Horie M. Genetic Background of Arrhythmic Disorders. *Jpn. J. Electrocardiol* 2010;30:200-208.
  42. Benson DW, Wang DW, Dymont M, Knilans TK, Fish FA, Strieper MJ, Rhodes TH, George AL, Jr.

Congenital sick sinus syndrome caused by recessive mutations in the cardiac sodium channel gene (SCN5A). *J Clin Invest* 2003;112:1019-28.
